1 **cytoNet: Network Analysis of Cell Communities**

2 Arun S. Mahadevan<sup>1</sup>, Byron L. Long<sup>1</sup>, Chenyue Wendy Hu<sup>1</sup>, David T. Ryan<sup>1</sup>, George L. Britton<sup>3</sup>, Andrew  
3 Ligeralde<sup>1</sup>, Aryeh Warmflash<sup>1,3</sup>, Jacob T. Robinson<sup>1,2</sup>, Amina A. Qutub<sup>1\*</sup>

4 <sup>1</sup>Department of Bioengineering, <sup>2</sup>Department of Electrical and Computer Engineering, <sup>3</sup>Department of  
5 Biosciences, Rice University, Houston, Texas, USA

6 \*Contact: [amina@rice.edu](mailto:amina@rice.edu)

7 **We introduce cytoNet, a method to characterize multicellular topology from microscopy images.**  
8 **Accessible over the web, cytoNet quantifies the spatial relationships in cell communities using**  
9 **principles of graph theory, and evaluates the effect of cell-cell interactions on individual cell**  
10 **phenotypes. We demonstrate cytoNet’s capabilities in two applications relevant to regenerative**  
11 **medicine: quantifying the morphological response of endothelial cells to neurotrophic factors present**  
12 **in the brain after injury, and characterizing cell cycle dynamics of differentiating neural progenitor cells.**  
13 **The framework introduced here can be used to study complex cell communities in a quantitative**  
14 **manner, leading to a deeper understanding of environmental effects on cellular behavior.**

15 A cell’s place in its environment influences a large part of its behavior. Advances in the field of phenotypic  
16 screening have yielded automated image analysis software that provide detailed phenotypic information  
17 at the single-cell level (such as morphology, stain texture and stain intensity) from microscopy images in  
18 a high-throughput manner<sup>1,2</sup>. However, current image analysis pipelines often do not account for spatial  
19 and density-dependent effects on cell phenotype. Various types of cell-cell interactions including  
20 juxtacrine and paracrine signaling are an integral part of biological processes that affect the behavior of  
21 individual cells. The recent emergence of technologies for multiparametric mapping of protein and RNA  
22 expression in individual cells while preserving the spatial structure of the tissue<sup>3</sup> has further highlighted  
23 the need to study single-cell behavior in the context of cell communities.

24 For these reasons, a robust method to quantify the spatial organization of cell communities and its  
25 influence on the behavior of individual cells adds an important, missing component to currently existing  
26 image analysis tools. Such a method can be used to enhance image-based biological discovery through  
27 phenotypic screens<sup>2</sup> by supplying multicellular metrics, provide a non-invasive means to standardize cell  
28 manufacturing for therapeutic purposes<sup>4</sup>, and develop a quantitative framework for the analysis of  
29 spatially-detailed human cell atlas data<sup>5,6</sup>.

30 Prior reports have accounted for population context in image-based screens by using features such as  
31 local cell density or a cell's position on an islet edge, that describe local cell crowding<sup>7,8</sup>. Mathematical  
32 graphs, structures that are used to model pairwise relationships between objects, are uniquely suited to  
33 cell community analysis. Among image-based methods that employ graph theory to analyze spatial  
34 relationships among cells, the cell-graph technique<sup>9</sup> has been employed to great effect in analyzing  
35 structure-function relationships in tissue sections. However, coupling single cell data to network structure  
36 has been elusive: there remains a need for a broadly applicable, user-friendly tool that enables spatial  
37 analysis of various different cell types, integrated with metrics describing the phenotype of individual  
38 cells.

39 Here we introduce an image analysis method called cytoNet for quantification of multicellular spatial  
40 organization using a graph theoretic approach. cytoNet is available as a web-based interface, providing  
41 significant ease of use compared with other programs that require downloading software. Taking  
42 fluorescence microscope images as input, the cytoNet image analysis pipeline identifies cells, creates  
43 spatial network representations tailored to the type of image and cell type, and calculates a set of metrics  
44 derived from graph theory that describe the network structure of the local multicellular neighborhood of  
45 a cell of interest. We define this multicellular neighborhood as a cell's community. Cell community metrics

46 are then integrated with descriptors of cell phenotype, such as morphology and protein expression, to  
 47 provide a comprehensive description of single- and multiple-cell phenotype states.

**Figure 1. The cytoNet image-processing pipeline.** (a) The pipeline begins with microscope images. (b) Segmentation algorithms automatically detect cell boundaries (**Supplementary Fig. 1, 2**). (c) Spatial proximity is determined either by measuring shared pixels between cell pairs – type I graphs (left panel) or by comparing distance between cell centroids to a threshold distance – type II graphs (right panel). (d) We represent the resulting network as an adjacency matrix. (e) Metrics derived from the adjacency matrix are used to describe network information. These metrics are a list of features computed on a per-cell basis.

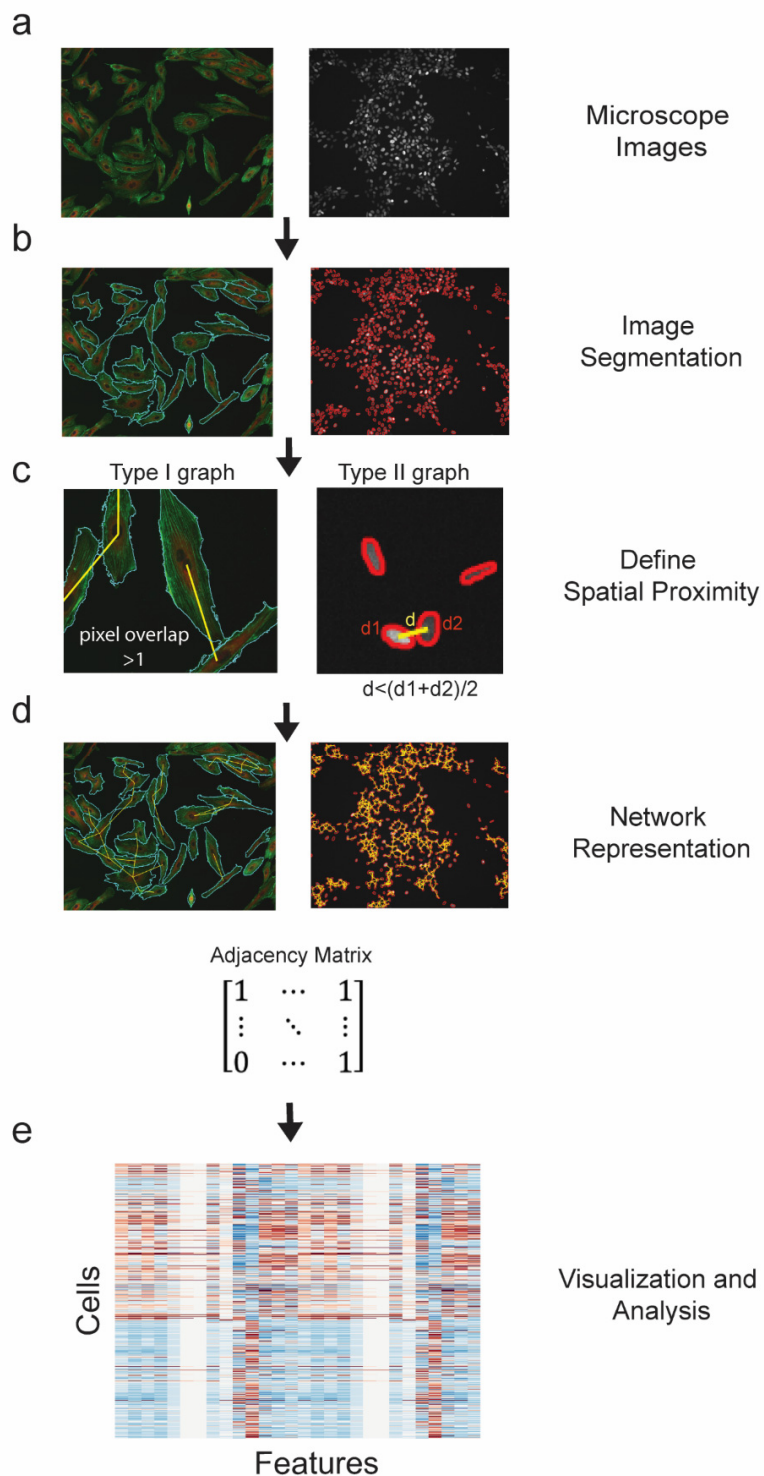

48 The cytoNet pipeline begins with microscope images (**Fig. 1a**). Appropriate segmentation algorithms are  
49 implemented to detect cells (**Fig. 1b, Supplementary Fig. 1-2**). Upon detection of cells, the next step is to  
50 evaluate spatial proximity of cells. We do this in one of two ways – by evaluating the overlap of adjacent  
51 cell boundaries (type I graphs), or by evaluating the proximity of cells in relation to a threshold distance  
52 (type II graphs) (**Fig. 1c**). The former approach is useful when detailed information of cell boundaries and  
53 morphology is available, such as in the case of membrane stains or cells stained for certain cytoskeletal  
54 proteins. The latter approach is useful when dealing with images of cell nuclei, where detection of exact  
55 cell boundaries is not possible. In both approaches, cells deemed adjacent to each other are connected  
56 through edges, resulting in a network representation (**Fig. 1d**). This connectivity is denoted  
57 mathematically using an adjacency matrix,  $A$  (**Fig. 1d**), where  $A_{i,j} = 1$  if there exists an edge between  
58 cells  $i$  and  $j$ , and 0 otherwise. Finally, the extracted metrics are used to visualize and analyze local  
59 neighborhood effects on individual cell phenotypes (**Fig. 1e**).

60 First, we demonstrate the utility of cytoNet in analyzing cell cycle dynamics in communities of  
61 differentiating neural progenitor cells. Neural progenitor cells are multipotent cells that can differentiate  
62 into neurons, astrocytes or oligodendrocytes. Cell cycle regulation in neural progenitor cells is of interest  
63 as it has implications for the genetic basis of brain size in different species<sup>10</sup> and aberrant regulation can  
64 cause diseases like microcephaly<sup>11</sup>. Studies in the ventricular zone of the embryonic mouse neocortex  
65 have shown that clusters of clonally-related neural progenitor cells go through the cell cycle together<sup>12,13</sup>.  
66 However, it is unclear whether this community effect is a ubiquitous feature of neural progenitor cells. To  
67 this end, we employed the cytoNet workflow to determine whether cell cycle synchronization is a feature  
68 of differentiating neural progenitor cells cultured in vitro.

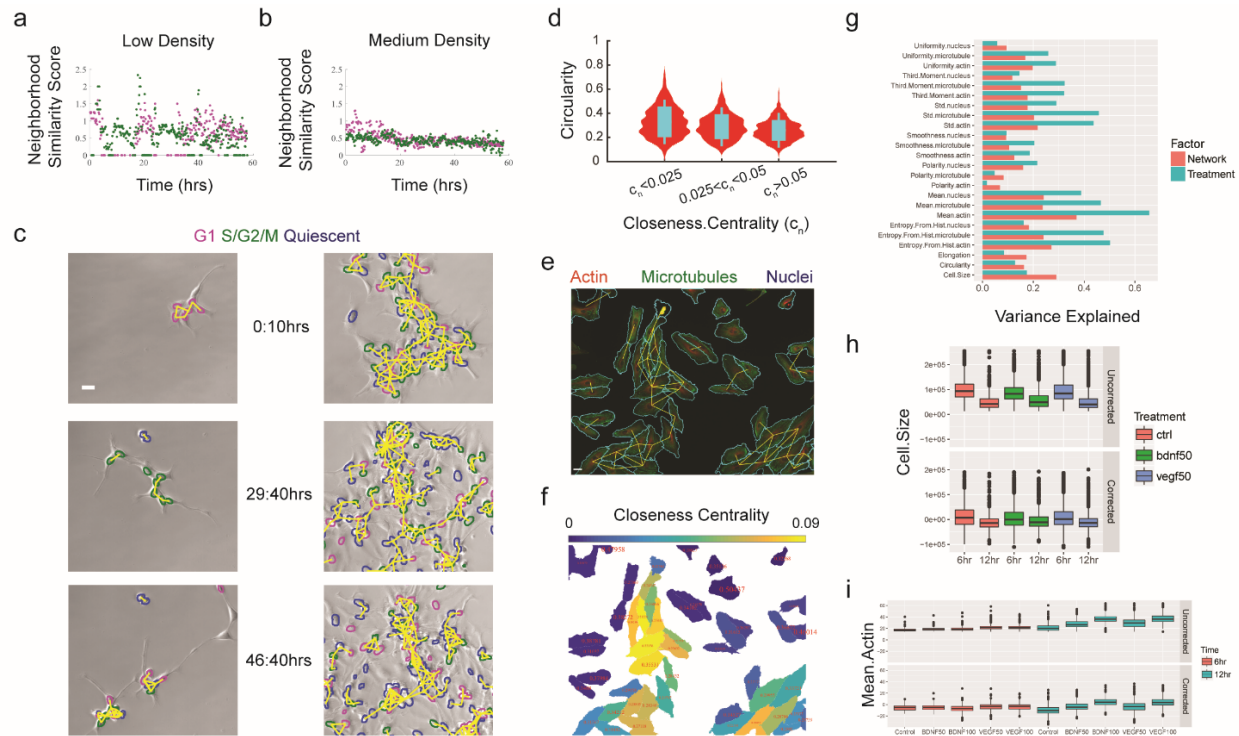

**Figure 2. cytoNet reveals dynamic cell community trends and influence of cell density on individual cell morphology.** (a-c) Spatiotemporal synchronization of cell cycle in differentiating neural progenitor cells (a) Neighborhood similarity score (Supplementary Table 1) for low-density culture across time. (b) Neighborhood similarity score across time for medium-density culture. (c) Frames from time-lapse movies corresponding to (a) and (b). Borders of mCherry+ nuclei (G1) are outlined in magenta, Venus+ nuclei (S/G2/M) are outlined in green, and mCherry-/Venus- nuclei (quiescent) are outlined in blue; scale bar = 50 $\mu$ m. (d-i) Influence of local neighborhood density on primary human endothelial cell (HUVEC) morphology. (d) Distribution of cell circularity values grouped under different levels of closeness centrality; Cohen's d effect size: groups (1, 2) = 0.34, groups (1, 3) = 0.62; sample size, n=786 cells (group 1;  $c_n < 0.025$ ), 741 cells (group 2;  $0.025 < c_n < 0.05$ ) and 782 cells (group 3;  $c_n > 0.05$ ) (e) Sample immunofluorescence image with graph representation overlaid; scale bar = 50  $\mu$ m. (f) Heatmap depicting closeness centrality of each cell, with circularity values overlaid in text. (g) Bar plot of variance explained by growth factor treatment and local network metrics. (h) Box plot of cell size as a function of growth factor treatment. (i) Box plot of mean actin intensity as a function of growth factor treatment. Legends and axes in (h-i) contain information on treatment (BDNF, VEGF), concentration (50ng/ml, 100ng/ml) and time of treatment (6 hours and 12 hours). Cohen's d effect size for (h-i) is shown in Supplementary Table 3.

69 For this investigation, ReNcell VM human neural progenitor cells were stably transfected with the FUCCI  
 70 cell cycle reporters<sup>14</sup> to generate Geminin-Venus/Cdt1-mCherry/H2B-Cerulean (FUCCI-ReN) cells. We  
 71 captured time-lapse movies of FUCCI-ReN cells after withdrawing growth factors to induce differentiation,  
 72 and built network representations from nucleus images. Adjacency was determined by comparing  
 73 centroid-centroid distance to a threshold (type II graphs, Fig. 1c).

74 In order to evaluate spatiotemporal synchronization in cell cycle, for each individual cell in a frame, we  
75 evaluated the average fraction of neighboring cells in a similar phase of the cell cycle (G1 phase –  
76 mCherry+ and S/G2/M phases – Venus+), normalized by total fraction of that cell type in the population.  
77 We called the average value of this fraction across all cells in an image the neighborhood similarity score,  
78  $N_S$  (**Supplementary Table 1**). Results for medium and low-density cultures are shown in **Fig. 2a** and **Fig.**  
79 **2b** respectively. Frames from corresponding time-lapse movies are shown in **Fig. 2c** (see also  
80 **Supplementary Videos 1-4**). We observed that groups of cells in the low-density culture moved through  
81 the cell cycle in unison, which was reflected in periodically high values of the neighborhood similarity  
82 score (**Fig. 2a, Supplementary Video 1-2**). In contrast, the composition of cell clusters in the medium  
83 density culture was relatively heterogeneous, resulting in relatively low values of the neighborhood  
84 similarity score over time (**Fig. 2b, Supplementary Video 3-4**). Neighboring cells in very low-density  
85 cultures are likely to be derived from the same clonal lineage, which explains the high level of  
86 synchronization in these cultures<sup>12</sup>. This example highlights how cytoNet can be used to derive insight into  
87 the role of cell-cell interactions on dynamic cell behavior.

88 Next, we used cytoNet to evaluate the relative influence of local neighborhood density and growth factor  
89 perturbations on endothelial cell morphology. From a regenerative medicine perspective, studying the  
90 morphological response of endothelial cells to neurotrophic stimuli can help assess the cells' potential  
91 angiogenic response following brain injuries that induce growth factor secretion, like ischemic stroke or  
92 transient hypoxia<sup>15,16</sup>. Common high-throughput angiogenic assays focus on migration and proliferation  
93 as the main cell processes defining angiogenesis, or the growth of new capillaries from existing ones<sup>17</sup>.  
94 Distinct morphology and cytoskeletal organization of endothelial cells indicate the cell's migratory or  
95 proliferative nature, and hence their angiogenic contribution within a sprouting capillary<sup>18</sup>. Reproducibly

96 quantifying the morphological response of endothelial cells to neurotrophic factors would enable more  
97 targeted approaches to enhancing brain angiogenesis.

98 We took an image-based approach to this problem, building a library of immunofluorescence images of  
99 human umbilical vein endothelial cells (HUVECs) stained for cytoskeletal structural proteins (actin,  $\alpha$ -  
100 tubulin) and nuclei, in response to various combinations of vascular endothelial growth factor (VEGF) and  
101 brain-derived neurotrophic factor (BDNF) treatment. Cell morphology was annotated using 21 metrics  
102 described in our previous study<sup>19</sup> (**Supplementary Table 2**), which included cell shape metrics like  
103 circularity and elongation, and texture metrics for cytoskeletal stains such as Actin polarity, smoothness  
104 etc. Cluster analysis on this dataset revealed dominant morphological phenotypes as a function of  
105 treatment conditions (**Supplementary Fig. 3**).

106 We then used the cytoNet workflow to quantify density-dependent effects on endothelial cell morphology  
107 in control cultures (without any growth factor perturbation). Network representations were designated  
108 based on shared cell pixels (type I graphs, **Fig. 1c**) and local network properties were described using seven  
109 metrics, including degree (number of neighbors) and centrality measures (indicating relative location of  
110 cells within colonies) (**Supplementary Table 1**). Our analysis showed correlations between cell  
111 morphological features and local network properties (**Supplementary Fig. 4**). Some of these relationships  
112 were expected, for instance the positive correlation between shared cell border and cell size. Other  
113 relationships, such as the negative correlation between cell circularity and closeness centrality, capture  
114 intuitive notions of the influence of cell packing on morphology (**Fig. 2d-f**). The closeness centrality of a  
115 cell (**Supplementary Table 1**) describes its relative position in a colony – cells in the middle of a colony will  
116 have higher centrality values than cells at the edge of a colony or isolated cells. The negative relationship  
117 between circularity and closeness centrality implies that isolated cells and cells located at the edge of



118 colonies are more likely to have a circular morphology, while more densely packed cells tend to be less  
119 circular (**Fig. 2e-f**). Thus, our analysis revealed that local network properties have a quantifiable effect on  
120 cell morphology.

121 Next, we developed a workflow to analyze the effect of growth factor treatments on cell morphology,  
122 while correcting for the effect of local network properties. We applied a quantile multidimensional binning  
123 approach<sup>20,21</sup> to calculate the variance in morphology metrics that could be individually explained by all  
124 local network metrics and growth factor treatments (**Fig. 2g**). We then calculated the values for each  
125 morphology metric after correcting for the effect of local network metrics (see **Methods**). The raw and  
126 network-corrected values for two metrics, cell size and mean actin intensity, are shown as box plots in  
127 **Fig. 2h-i**. The influence of network properties can be clearly seen on cell size, where at 6 hours, large cell  
128 sizes are seen in the uncorrected but not corrected plots (**Fig. 2h**). The effect of growth factor treatment  
129 can be clearly seen in network-corrected mean actin intensity (**Fig. 2i, Supplementary Table 3**), where  
130 VEGF and BDNF treatment have dose-dependent effects on mean actin intensity. Thus, cytoNet detects  
131 the independent effects of local neighborhood properties and growth factor perturbations on endothelial  
132 cell morphology.

133 The examples described above illustrate how cytoNet can be used to enhance image informatics for  
134 phenotypic screens as well as basic discovery in biology. From the image informatics perspective, cytoNet  
135 adds crucial information on local cell density to the suite of metrics that are currently used to characterize  
136 individual cells. We illustrated how local network metrics can be used to infer independent effects of cell  
137 density and chemical perturbations. This workflow can be used to more comprehensively characterize the  
138 response of cells to chemical perturbations, which can aid in drug discovery.



139 The cytoNet workflow can also be used to quantitatively study biological pathways involved in cell-cell  
140 communication. The combination of visualizing dynamic cell behavior through time-lapse movies and  
141 quantifying local cell-cell interactions is particularly powerful. This paradigm can be of great benefit in  
142 stem cell biology to evaluate environmental effects on cell fate decisions. More broadly, the principle  
143 behind cytoNet – treating cell communities as complex ecosystems – will help transition from  
144 characterizing cells as independent ‘silos’ to a more holistic approach, where due importance is given to  
145 the environment surrounding cells.

#### 146 **ACKNOWLEDGEMENTS**

147 We thank Dr. David Noren, Dr. André Schultz and Tien Tang for helpful discussions and comments on the  
148 manuscript, and Amada Abrego, Becky Zaunbrecher and Grace Ching for technical assistance. This work  
149 was supported by NSF Career Grant 1150645 to AAQ, NSF Neural and Cognitive Systems grant 1533708  
150 to AAQ and JTR, NSF award 1553228 to AW and CPRIT award RR140073 to AW. ASM was supported  
151 through NSF IGERT training grant 1250104.

#### 152 **AUTHOR CONTRIBUTIONS**

153 ASM, DTR, JTR and AAQ designed the experiments. ASM, GLB and DTR performed the experiments. AAQ,  
154 BLL, CWH and ASM analyzed the data. BLL and AL designed and implemented the cytoNet website. All  
155 authors contributed to writing the manuscript. AAQ, AW and JTR supervised the work.

#### 156 **COMPETING FINANCIAL INTERESTS**

157 The authors declare no competing financial interests.

158 **REFERENCES**

- 159 1. Meijering, E., Carpenter, A. E., Peng, H., Hamprecht, F. A. & Olivo-Marin, J.-C. Imagining the  
160 future of bioimage analysis. *Nat. Biotechnol.* **34**, 1250–1255 (2016).
- 161 2. Bray, M.-A. *et al.* Cell Painting, a high-content image-based assay for morphological profiling  
162 using multiplexed fluorescent dyes. *Nat. Protoc.* **11**, 1757–1774 (2016).
- 163 3. Halpern, K. B. *et al.* Single-cell spatial reconstruction reveals global division of labour in the  
164 mammalian liver. *Nature* **542**, 352–356 (2017).
- 165 4. Anderson, A. J., Piltti, K. M., Hooshmand, M. J., Nishi, R. A. & Cummings, B. J. Preclinical Efficacy  
166 Failure of Human CNS-Derived Stem Cells for Use in the Pathway Study of Cervical Spinal Cord  
167 Injury. *Stem Cell Reports* **8**, 249–263 (2017).
- 168 5. Lavin, Y. *et al.* Innate Immune Landscape in Early Lung Adenocarcinoma by Paired Single-Cell  
169 Analyses. *Cell* **169**, 750–765.e17 (2017).
- 170 6. Thul, P. J. *et al.* A subcellular map of the human proteome. *Science (80-. ).* **356**, (2017).
- 171 7. Snijder, B. *et al.* Population context determines cell-to-cell variability in endocytosis and virus  
172 infection. *Nature* **461**, 520–523 (2009).
- 173 8. Schapiro, D. *et al.* histoCAT: analysis of cell phenotypes and interactions in multiplex image  
174 cytometry data. *Nat. Methods* (2017). doi:10.1038/nmeth.4391

- 175 9. Yener, B. & Bülent. Cell-graphs. *Commun. ACM* **60**, 74–84 (2016).
- 176 10. Otani, T. *et al.* 2D and 3D Stem Cell Models of Primate Cortical Development Identify Species-  
177 Specific Differences in Progenitor Behavior Contributing to Brain Size. *Cell Stem Cell* **18**, 467–480  
178 (2016).
- 179 11. Li, C. *et al.* Zika Virus Disrupts Neural Progenitor Development and Leads to Microcephaly in Mice.  
180 *Cell Stem Cell* **19**, (2016).
- 181 12. Cai, L., Hayes, N. L. & Nowakowski, R. S. Synchrony of clonal cell proliferation and contiguity of  
182 clonally related cells: production of mosaicism in the ventricular zone of developing mouse  
183 neocortex. *J. Neurosci.* **17**, 2088–100 (1997).
- 184 13. Reznikov, K. & van der Kooy, D. Variability and partial synchrony of the cell cycle in the germinal  
185 zone of the early embryonic cerebral cortex. *J. Comp. Neurol.* **360**, 536–54 (1995).
- 186 14. Sakaue-Sawano, A. *et al.* Visualizing Spatiotemporal Dynamics of Multicellular Cell-Cycle  
187 Progression. *Cell* **132**, 487–498 (2008).
- 188 15. López-Cancio, E. *et al.* Reported Prestroke Physical Activity Is Associated with Vascular  
189 Endothelial Growth Factor Expression and Good Outcomes after Stroke. *J. Stroke Cerebrovasc.*  
190 *Dis.* **26**, 425–430 (2017).
- 191 16. Wei, Z. Z. *et al.* Neuroprotective and regenerative roles of intranasal Wnt-3a Administration after

- 192 focal ischemic stroke in mice. *J. Cereb. Blood Flow Metab.* 0271678X1770266 (2017).  
193 doi:10.1177/0271678X17702669
- 194 17. Goodwin, A. M. In vitro assays of angiogenesis for assessment of angiogenic and anti-angiogenic  
195 agents. *Microvasc. Res.* **74**, 172–183 (2007).
- 196 18. Costa, G. *et al.* Asymmetric division coordinates collective cell migration in angiogenesis. *Nat. Cell*  
197 *Biol.* **18**, 1292–1301 (2016).
- 198 19. Slater, J. H. *et al.* Recapitulation and Modulation of the Cellular Architecture of a User-Chosen  
199 Cell of Interest Using Cell-Derived, Biomimetic Patterning. *ACS Nano* **9**, 6128–6138 (2015).
- 200 20. Snijder, B. *et al.* Single-cell analysis of population context advances RNAi screening at multiple  
201 levels. *Mol. Syst. Biol.* **8**, (2012).
- 202 21. Gut, G., Tadmor, M. D., Pe'er, D., Pelkmans, L. & Liberali, P. Trajectories of cell-cycle progression  
203 from fixed cell populations. *Nat. Methods* **12**, 951–4 (2015).

204

205 **METHODS**

206 **Software.** CytoNet is available as a web interface at <https://qutublab.org/cytoNet/>

207 See **Supplementary Methods 1** for instructions on using cytoNet.

208 **Cell Culture.** Human umbilical vein endothelial cells (HUVECs, Lonza) were cultured in EBM-2 medium  
209 (Lonza) supplemented with penicillin-streptomycin (Fisher Scientific) and EGM-2 SingleQuot bullet kit  
210 (Lonza). For imaging experiments, cells were cultured for different periods (6, 12 or 24 hours) in different  
211 combinations of vascular endothelial growth factor (VEGF, human recombinant; Millipore) and brain-  
212 derived neurotrophic factor (BDNF, human recombinant, Sigma-Aldrich). Concentrations used were in the  
213 range 50-100ng/mL. Controls were the same culture period without growth factor treatments.

214 Immortalized human neural progenitor cells derived from the ventral midbrain (ReNCell VM) were  
215 obtained from Millipore. Cells were expanded on laminin-coated tissue culture flasks, in media containing  
216 DMEM/F12 supplemented with B27 (both Life Technologies), 2µg/ml Heparin (STEMCELL Technologies),  
217 20ng/ml bFGF (Millipore), 20ng/ml EGF (Sigma) and penicillin/streptomycin. For differentiation  
218 experiments, cells were cultured in medium lacking bFGF and EGF.

219 **FUCCI Reporter Lines.** Stable reporter cell lines (FUCCI-ReN) were generated by sequentially nucleofecting  
220 ReNcell VM neural progenitor cells with an ePiggyBac<sup>22</sup> construct encoding mCherry-Cdt, Venus-Geminin,  
221 or Cerulean-H2B. Each construct introduced to the cells was driven by a CAG promoter containing a  
222 blasticidin (ePB-B-CAG-mCherry-Cdt1), puromycin (ePB-P-Venus-Geminin), or neomycin (ePB-N-Cerulean-  
223 H2B) resistance gene. Following each round of nucleofection, cells were cultured in the presence of  
224 appropriate antibiotics (2 µg/ml blasticidin, 0.1 µg/ml puromycin and 100 µg/ml neomycin).

225 **HUVEC Immunocytochemistry.** For imaging experiments, HUVECs were cultured on glass dishes coated  
226 with fibronectin (Sigma-Aldrich). After appropriate growth factor treatments, cultures were fixed with 4%  
227 paraformaldehyde, free aldehyde groups were quenched using 1mg/mL sodium borohydride, and

228 membranes were permeabilized with 0.2% Triton-X-100 solution in PBS. Actin fibers were visualized using  
229 an Alexa Fluor 488-phalloidin antibody (1:40, Molecular Probes) and microtubules were visualized using a  
230 mouse monoclonal anti- $\alpha$ -Tubulin antibody (1:250, Sigma-Aldrich) followed by a goat anti-mouse Alexa  
231 Fluor 647 secondary antibody. Nuclei were stained using Hoescht (Molecular Probes). 16-bit composite  
232 immunofluorescence images were acquired through a 20X objective (N.A. = 0.75) on a Nikon Ti-E  
233 epifluorescence microscope. Physical pixel size was 0.32 $\mu$ m.

234 **Time-lapse Microscopy.** Fucci-ReN cells were plated at different densities on chambered cover glasses  
235 (Fisher Scientific) coated with laminin. Cells were imaged after switching to differentiation medium  
236 containing phenol red-free DMEM/F12. Time-lapse imaging was performed using a Nikon Ti-E microscope  
237 equipped with a motorized stage, a cage incubator for environmental control (Okolab), a 20X objective  
238 lens (N.A. = 0.75), SOLA SE Light Engine for LED-based fluorescence excitation (Lumencor), appropriate  
239 filters for visualizing mCherry, Venus and Cerulean fluorescent proteins and a Zyla 5.5 sCMOS camera  
240 (ANDOR). 16-bit composite fluorescence images were acquired at 10 minute intervals for a total duration  
241 of 57.5 hours.

242 **Image Processing of HUVEC Immunofluorescence Images.** Fluorescence images were processed as  
243 described previously<sup>23</sup> (**Supplementary Fig. 1**). Briefly, the following steps were used.

- 244 1. Contrast was enhanced using histogram equalization.
- 245 2. Images were smoothed using a 2D Gaussian lowpass filter.
- 246 3. Initial binarization was performed using Otsu's method.
- 247 4. The binary image was dilated to fill in individual cell areas.
- 248 5. All objects <1% of the total image area were removed. This was called the final binary image.
- 249 6. A binary representation of the nuclear and microtubule image layers was generated using a high  
250 input threshold value. This was called the marker image.

- 251 7. Another binary image was created with values of 0 where either the final binary image (step 5) or  
252 the marker image (step 6) had a value of 1.
- 253 8. Watershed markers were generated by imposing the minimum of the complement of images  
254 obtained in steps 2 and 7. This image had black markers contained within cells to serve as basins  
255 for flooding, while cell areas themselves were represented by lighter pixels that served as the  
256 rising contours of the basins.
- 257 9. The watershed algorithm was implemented using Matlab's built-in function to generate cell  
258 boundaries.
- 259 10. Masks generated in step 9 were refined by using composite images of microtubules and actin as  
260 the marker image (step 6).

261 In order to automate the threshold generation, the area of cell masks obtained from segmentation were  
262 compared to those obtained through thresholding with a high threshold. The entire process was then  
263 iterated until an acceptable area ratio was achieved.

264 **Image Processing of FUCCI-ReN Time-Lapse Images.** Grayscale images for each channel (H2B-Cerulean,  
265 Geminin-Venus and Cdt1-mCherry) were binarized using locally adaptive thresholding. Seeds for the  
266 watershed transform were generated using the regional minimas from the distance transform of the  
267 grayscale images. Next, the watershed algorithm was applied to detect boundaries between overlapping  
268 cell nuclei. Finally, information from different channels were used to correct undersegmented nuclei.

269 **Generation of Network Representation.** Type I graphs were generated as follows. Mask boundaries were  
270 expanded by 2 pixels and overlap of expanded masks was used to assign edges and build an adjacency  
271 matrix (**Fig. 1c**). Cells touching the image border were included in calculations of local network properties  
272 (**Supplementary Table 1**) for cells not touching the boundary, but were excluded for the construction of  
273 the adjacency matrix.



274 Type II graphs were generated as follows: For each pair of objects (nuclei), a threshold distance for  
275 proximity was defined as the average of the two object diameters, multiplied by a scaling factor (S). If the  
276 Euclidean distance between the object centroids was lower than the threshold distance computed, then  
277 the pair of objects was connected with an edge (**Fig. 1c**). We chose a default scaling factor  $S = 2$  for all our  
278 analysis, through visual inspection of cell adjacency.

279 **Network Metric Computation.** All the network metrics described in **Supplementary Table 1** were  
280 computed using custom-written code, building upon the routines provided in Bounova et al<sup>24</sup>.

281 **Correction of morphology metrics for effects of local network properties and treatment conditions.** We  
282 performed quantile multidimensional binning<sup>20</sup> of cells for all 7 network metrics (5 bins per metric). The  
283 mean of each morphology metric was calculated for each multidimensional bin, and this mean was  
284 subtracted from the raw measurements to generate the network-corrected measurements for each cell.  
285 Treatment-corrected measurements were generated similarly by calculating the mean of each  
286 morphology metric under each treatment condition and then subtracting it from the raw measurements.

287 **Variance explained by local network properties and treatment conditions.** The variance explained by  
288 each factor was calculated using the following formula<sup>21</sup>

289 
$$1 - V_{corr}/V_{uncorr}$$

290  $V_{corr}$  is the variance of the corrected measurements, and  $V_{uncorr}$  is the variance of the uncorrected  
291 measurements.

292 22. Lacoste, A., Berenshteyn, F. & Brivanlou, A. H. An Efficient and Reversible Transposable System  
293 for Gene Delivery and Lineage-Specific Differentiation in Human Embryonic Stem Cells. *Cell Stem*  
294 *Cell* **5**, 332–342 (2009).

- 295 23. Ryan, D. T., Hu, J., Long, B. L. & Qutub, A. A. Predicting Endothelial Cell Phenotypes in  
296 Angiogenesis. in *ASME 2013 2nd Global Congress on NanoEngineering for Medicine and Biology*  
297 V001T05A013-V001T05A013 (ASME, 2013). doi:10.1115/NEMB2013-93124
- 298 24. Bounova, G. & De Weck, O. Overview of metrics and their correlation patterns for multiple-  
299 metric topology analysis on heterogeneous graph ensembles. *Phys. Rev. E - Stat. Nonlinear, Soft*  
300 *Matter Phys.* **85**, (2012).

## cytoNet: Network Analysis of Cell Communities

Arun S. Mahadevan, Byron L. Long, David T. Ryan, George L. Britton, Aryeh Warmflash, Jacob T.

Robinson, Amina A. Qutub

|                                |                                                                                                                |
|--------------------------------|----------------------------------------------------------------------------------------------------------------|
| <b>Supplementary Figure 1</b>  | Image segmentation of HUVEC immunofluorescence images.                                                         |
| <b>Supplementary Figure 2</b>  | Image segmentation of FUCCI-ReN nucleus images                                                                 |
| <b>Supplementary Figure 3</b>  | Unique HUVEC morphological phenotypes in response to neurotrophic factors                                      |
| <b>Supplementary Figure 4</b>  | Correlation heatmap of local network metrics and morphology metrics for immunofluorescence HUVEC images        |
| <b>Supplementary Table 1</b>   | Metrics describing local community, calculated at the level of individual cells                                |
| <b>Supplementary Table 2</b>   | Metrics used to define cellular architecture.                                                                  |
| <b>Supplementary Table 3</b>   | Cohen's d effect size for treatment conditions on morphology metrics shown in Figure 2 (h-i) in the main text. |
| <b>Supplementary Video 1</b>   | Time-lapse movie of sparse culture of FUCCI-ReN cells                                                          |
| <b>Supplementary Video 2</b>   | Time-lapse movie of sparse culture of FUCCI-ReN cells, with cell boundaries and graph representation overlaid  |
| <b>Supplementary Video 3</b>   | Time-lapse movie of dense culture of FUCCI-ReN cells                                                           |
| <b>Supplementary Video 4</b>   | Time-lapse movie of dense culture of FUCCI-ReN cells, with cell boundaries and graph representation overlaid   |
| <b>Supplementary Methods 1</b> | Instructions for using the web-based user interface                                                            |

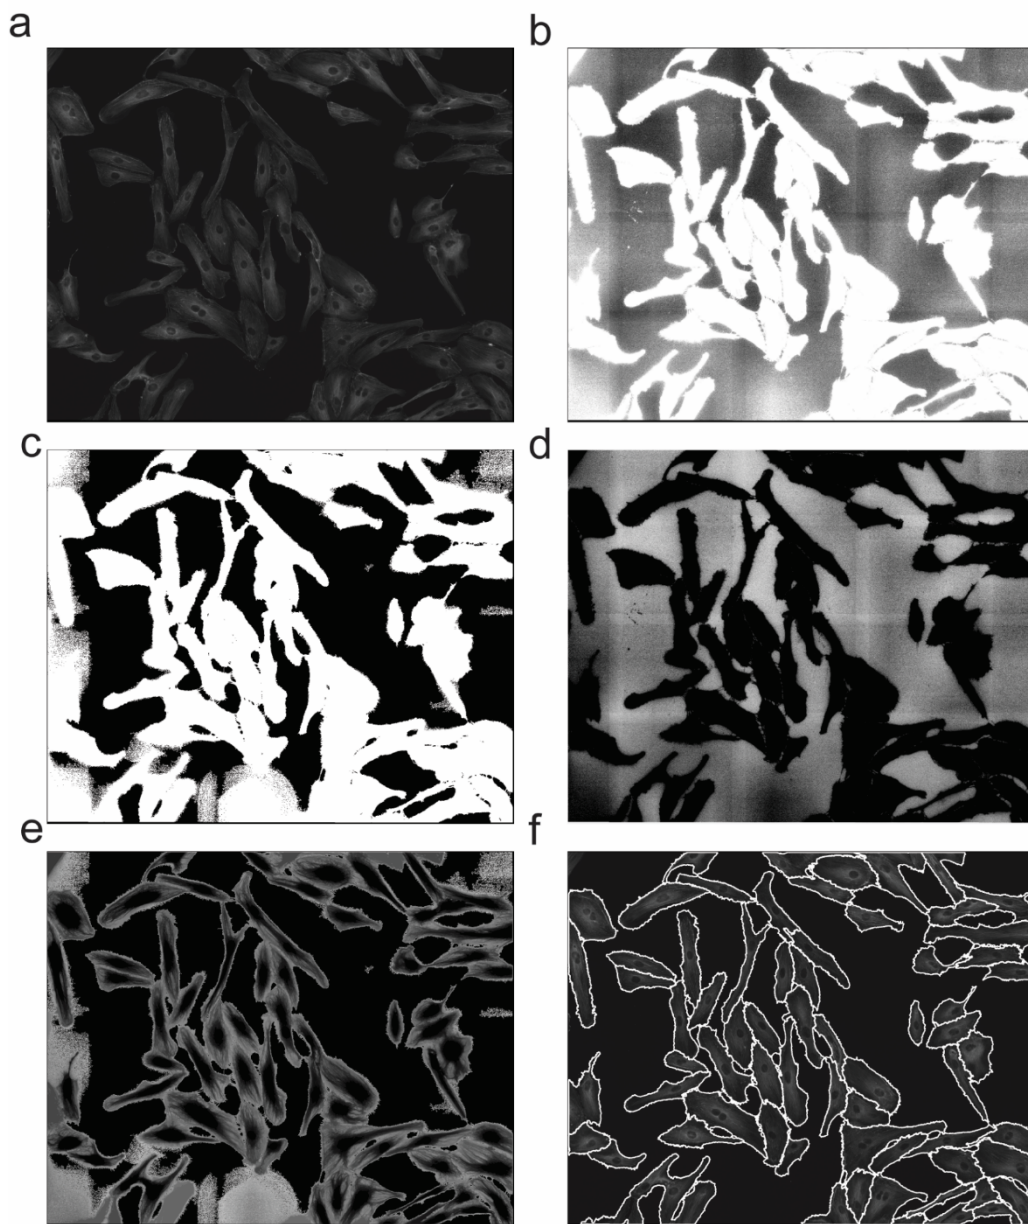

**Supplementary Figure 1. Image segmentation of HUVEC immunofluorescence images. (a)** Original grayscale image. **(b)** Image after adaptive histogram equalization and Gaussian filtering. **(c)** Binary image obtained using Otsu's threshold, with small objects removed. **(d)** Complement of filtered image in **(b)**. **(e)** Watershed basins obtained through imposing minimum of images in **(d)** and the marker image (obtained by combining the binary image in **(c)** and the image obtained through binarization of microtubules and nuclei). **(f)** Final cell borders.

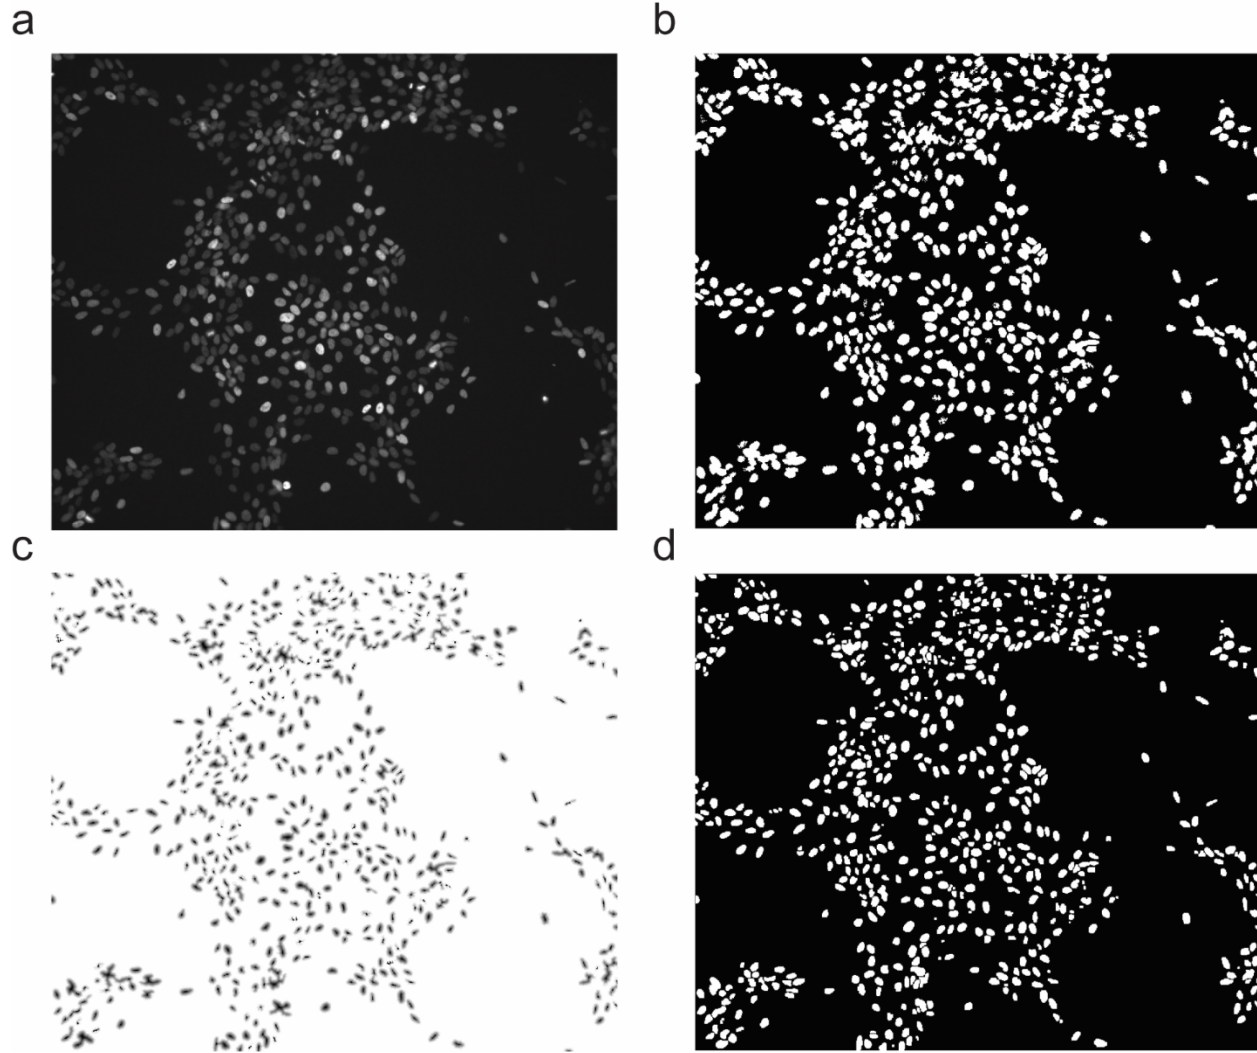

**Supplementary Figure 2. Image processing steps for FUCCI-ReN nucleus images. (a)** Fluorescence image from H2B-Cerulean channel marking all nuclei. **(b)** Binary mask obtained through adaptive thresholding. **(c)** Image obtained through imposing minimum of distance transform of binary image in **(b)** and local minima. This image serves as seeds for the watershed algorithm. **(d)** Final mask obtained after watershed transform.

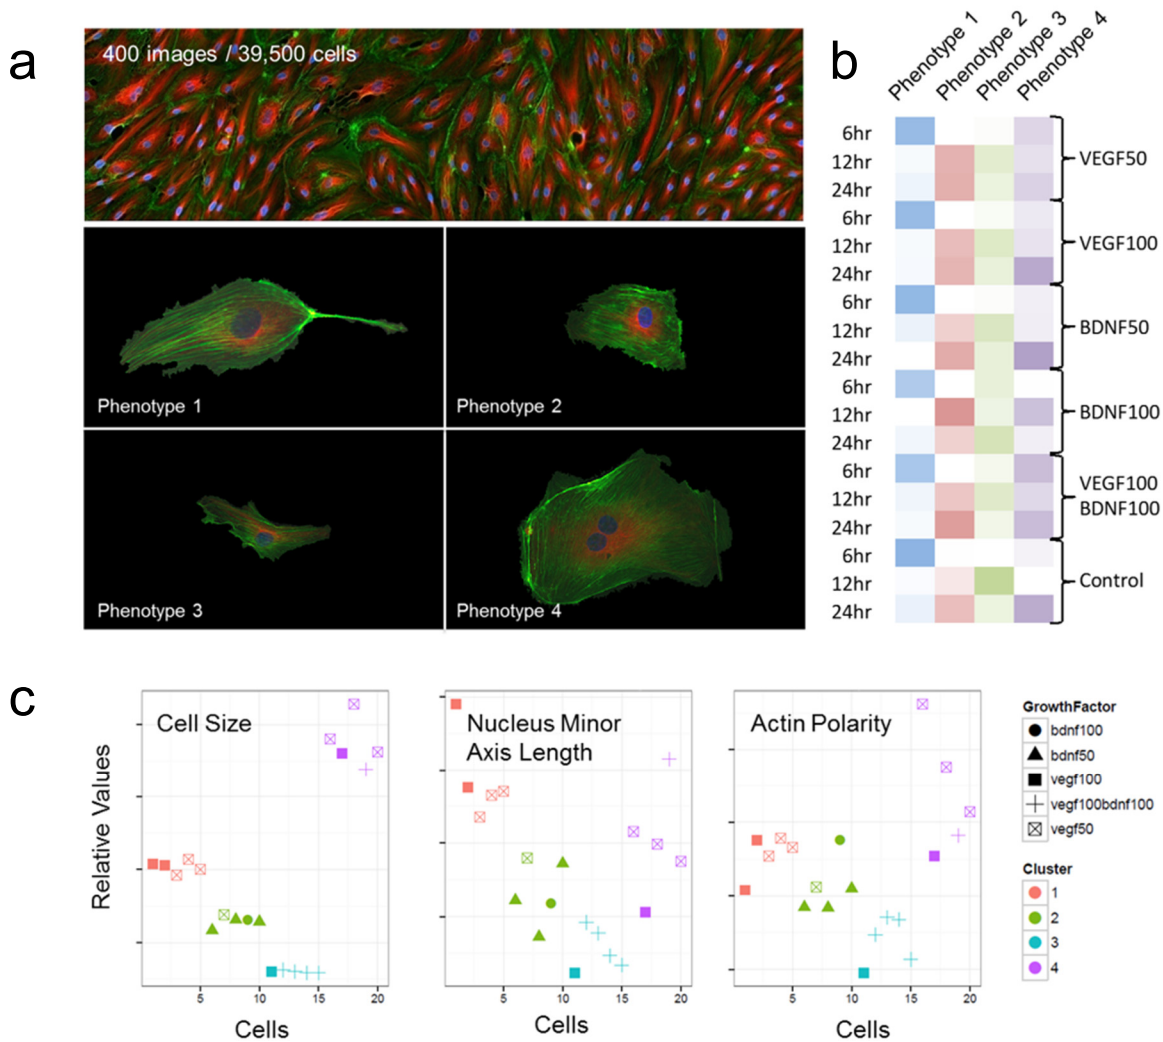

**Supplementary Figure 3. Unique HUVEC morphological phenotypes in response to stimulation by neurotrophic factors vascular endothelial growth factor (VEGF) and brain-derived neurotrophic factor (BDNF).** (a) The ‘average cell phenotype’ displayed of each cluster obtained from clustering morphological features of 39,500 cells from 400 monolayer images of endothelial cells stained for actin (green), microtubules (red) and Hoescht (blue). K-means clustering was performed across all cells for all conditions, with the optimal number of four clusters identified by Silhouette scores, using Euclidean distance as the similarity metric. Morphological features within each phenotype captured quantitatively what has been observed qualitatively during coordinated cell processes of angiogenesis. As an example, phenotype 4, a multi-nucleated cell showing nuclear asymmetry, indicates a proliferative state. Elongated cells with asymmetrical actin distribution and relatively large nuclei show both migratory and proliferative properties (e.g., phenotype 1) (b) Cluster membership of cells after stimulation by VEGF and BDNF for 6, 12 and 24 hrs is displayed, corresponding to clusters from (a). Cells in each condition change their cluster assignment over time as a function of stimuli. Shading indicates % of cells in that cluster (darker = higher %). (c) Example feature metrics of endothelial cell phenotypes resulting from BDNF and VEGF stimulation. Cell size, the minor axis length of the nucleus, and actin polarity were among features that contributed the most variance in the endothelial dataset. Each point in the plot represents metric values for the average cell for all time-points for each of the five growth factor conditions. Cell order (x-axis) is arbitrary, while relative values (y-axis) are normalized to the maximum value per metric across all cells. Color corresponds to the closest cell phenotype from (a) to which an average cell from each stimulation condition belongs.



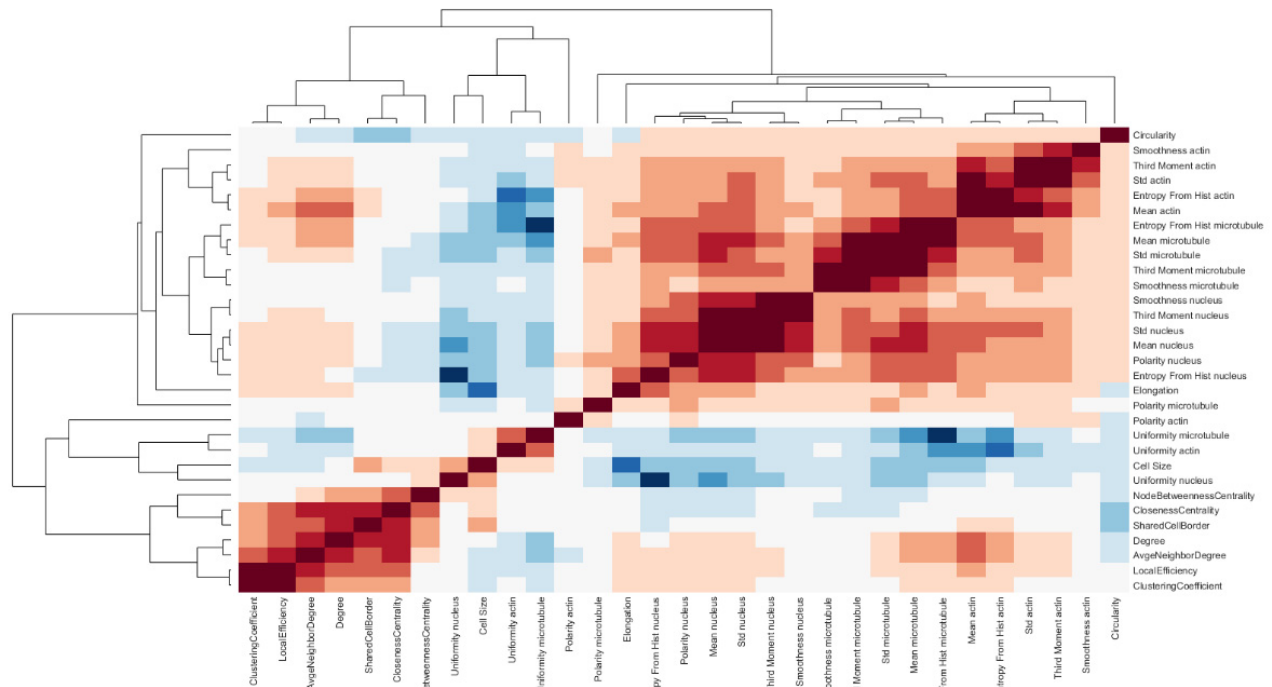

**Supplementary Figure 4. Correlation heatmap of local network metrics and morphology metrics for immunofluorescence HUVEC images.** All morphology and local network metrics (**Supplementary Table 1, Supplementary Table 2**) were combined into a single matrix. The cluster dendrogram was obtained through hierarchical clustering of the covariance matrix using Pearson's correlation as the similarity metric.



**Supplementary Table 1. Metrics describing local community, calculated at the level of individual cells.**

| <b>Graph Metrics</b>               | <b>Symbol</b> | <b>Definition</b>                                                                                                       |
|------------------------------------|---------------|-------------------------------------------------------------------------------------------------------------------------|
| <b>Degree*</b>                     | $k$           | Number of neighbors (one link away)                                                                                     |
| <b>Average Neighbor Degree</b>     | $k_n$         | Average degree of all neighboring cells                                                                                 |
| <b>Clustering Coefficient</b>      | $C$           | Fraction of total possible links among the neighbors of a node that are actually present, averaged across all neighbors |
| <b>Local Efficiency</b>            | $E_l$         | Average shortest path length in local neighborhood                                                                      |
| <b>Node Closeness Centrality</b>   | $c_n$         | Sum of reciprocal distances to all other nodes                                                                          |
| <b>Node Betweenness Centrality</b> | $w_n$         | Number of shortest paths that pass through the node                                                                     |
| <b>Shared Border Length**</b>      | $S_l$         | Length of border shared with neighboring cells, in pixels                                                               |

\*The fraction of neighbors of a certain phenotype is used to compute the neighborhood similarity score,  $N_S$

\*\*Valid only for type I graphs (adjacency evaluated through shared pixels)

**Supplementary Table 2. Metrics used to define cellular architecture.**

| Metrics                         | Definition                                                                          | Mathematical Representation                                                                                                                                    |
|---------------------------------|-------------------------------------------------------------------------------------|----------------------------------------------------------------------------------------------------------------------------------------------------------------|
| Cell Size                       | Cell spread area                                                                    | $A_C$                                                                                                                                                          |
| Circularity                     | Shape factor                                                                        | $\frac{4\pi \cdot A_C}{P_C}$                                                                                                                                   |
| Where $P_C$ = perimeter of cell |                                                                                     |                                                                                                                                                                |
| Elongation                      | Shape factor                                                                        | $\frac{P_C}{A_C}$                                                                                                                                              |
| Polarity*                       | Distance between center of mass of stain and the centroid of the cell               | $\sqrt{(\chi_{C,x} - \Omega_{S,x})^2 + (\chi_{C,y} - \Omega_{S,y})^2}$<br>Where $\Omega_S$ = center of mass of stain<br>$\chi_C$ = centroid of cell            |
| Mean*                           | First moment of grayscale stain intensity distribution                              | $\sum_{i=0}^{255} \frac{i}{255} \cdot p$<br>Where $p$ is the histogram counts of the image for pixel intensities, with 256 possible bins for a grayscale image |
| Standard Deviation*             | Second moment of grayscale stain intensity distribution                             | $\sqrt{\sum_{i=0}^{255} \left(\frac{i}{255}\right)^2 \cdot p}$                                                                                                 |
| Third Moment*                   | Third moment of stain intensity distribution                                        | $\frac{1}{255^2} \sum_{i=0}^{255} \frac{i^3}{255} \cdot p$                                                                                                     |
| Smoothness*                     | Measure of smoothness of stain                                                      | $1 - \frac{1}{1 + \left(\frac{1}{255^2} \sum_{i=0}^{255} \frac{i^2}{255} \cdot p\right)}$                                                                      |
| Entropy from Histogram*         | Measure of randomness of the stain intensity                                        | $-\sum p \cdot \log_2(p)$                                                                                                                                      |
| Uniformity*                     | Sum of squared elements in the histogram counts of the image for pixel intensities. | $\sum p^2$                                                                                                                                                     |

\*Computed for all 3 stains (nucleus, actin and microtubules)

**Supplementary Table 3. Cohen's d effect size for treatment conditions on morphology metrics shown in Figure 2(h-i) in the main text.**

| Morphology Metric | Treatment Condition | Cohen's d Effect Size |                    |                   |                  |
|-------------------|---------------------|-----------------------|--------------------|-------------------|------------------|
|                   |                     | 6hr (uncorrected*)    | 12hr (uncorrected) | 6hr (corrected**) | 12hr (corrected) |
| Cell.Size         |                     |                       |                    |                   |                  |
|                   | BDNF50              | 0.256                 | 0.217              | 0.148             | 0.170            |
|                   | VEGF50              | 0.151                 | 0.023              | 0.093             | 0.068            |
| Mean.Actin        |                     | 6hr (uncorrected)     | 12hr (uncorrected) | 6hr (corrected)   | 12hr (corrected) |
|                   | BDNF50              | 0.381                 | 1.020              | 0.091             | 0.873            |
|                   | BDNF100             | 0.517                 | 2.522              | 0.260             | 1.959            |
|                   | VEGF50              | 1.121                 | 1.018              | 0.348             | 0.740            |
|                   | VEGF100             | 1.267                 | 2.269              | 0.284             | 1.808            |

\* no correction for network metrics

\*\* correction applied for network metrics

### **Supplementary Video 1**

Time-lapse movie of sparse culture of FUCCI-ReN cells. Magenta: Cdt1-mCherry, Green: Geminin-Venus.

Time stamp is shown on top right corner.

### **Supplementary Video 2**

Time-lapse movie of sparse culture of FUCCI-ReN cells with graph overlay. Movie displays phase contrast frames from movie in Supplementary Video 1, with Cdt1(-)/mCherry(+) nuclei circled in magenta, Geminin(-)/Venus(+) nuclei circled in green and mCherry(-)/Venus(-) nuclei circled in blue. Yellow lines represents proximity edges.

### **Supplementary Video 3**

Time-lapse movie of dense culture of FUCCI-ReN cells. Magenta: Cdt1-mCherry, Green: Geminin-Venus.

Time stamp is shown on top right corner.

### **Supplementary Video 4**

Time-lapse movie of dense culture of FUCCI-ReN cells with graph overlay. Movie displays phase contrast frames from movie in Supplementary Video 3, with Cdt1(-)/mCherry(+) nuclei circled in magenta, Geminin(-)/Venus(+) nuclei circled in green and mCherry(-)/Venus(-) nuclei circled in blue. Yellow lines represents proximity edges.

## Supplementary Methods 1

### Instructions for using the web-based user interface

1. Go to <http://qutublab.rice.edu/cytoNet/>

Explanation of parameters and input format can also be downloaded there.

2. Select images

a) Select image files by clicking on the 'Choose Files' button to start a file selection dialog box. Multiple files can be selected by: a) clicking on a file while holding down the control key (command key in MacOS); b) clicking and dragging; or c) entering control-a (command-a in MacOS) to select all files in a directory or folder. Color input images are first converted to grayscale images by cytoNet before being processed as previously described. Binary input images are considered to already be binary masks and the segmentation step is skipped.

b) Select image number. Some image file formats such as tiff support the storage of multiple images per file. If your images are not stored in tiff files, you may skip this parameter. Otherwise you can specify which images in each file will be processed by using comma separated (1-based) indices. Hence 1,3 indicates the first and third images in each file. Indices must be specified in increasing order.

c) For demonstration purposes, cytoNet also provides images if you do not have your own.

3. Select edge determination method

a) Edges between nearby objects are determined by the distance between their centroids.

b) Edges between touching objects are determined by the sharing of border pixels.

#### 4. Select adjacency threshold

When edges are determined by the distance between centroids, an adjacency threshold parameter is required. The adjacency threshold determines the maximum distance between two centroids at which an edge is created in the following way. Let  $a_1$  and  $a_2$  be the area of two objects with centroids  $c_1$  and  $c_2$  respectively. For each object, compute its effective radius:  $r_i = \sqrt{\frac{a_i}{\pi}}$ . A graph edge is placed between two objects (vertices) whenever the distance between their centroids is within the adjusted sum of their effective radii:  $distance(c_1, c_2) \leq S \cdot (r_1 + r_2)$  where  $S$  is the user defined adjacency threshold parameter.

5. Enter an email address. cytoNet will use this email address to inform you that processing is complete.

6. Click the Submit button.

7. cytoNet will send you an email message indicating that your request has been accepted. This message includes a Request ID that you can use to check on the progress of your request. cytoNet will also send you an email message informing you that processing has ended for your request.

8. When your request has been successfully processed, you may download your results. Note that your results will be available for only a limited amount of time.

Results are formatted as follows. Global metrics are tabulated in a file called 'GlobalMetrics.csv' for all images in the input folder. Local metrics, computed on a per-cell basis are tabulated in a separate file for each image called 'LocalMetrics\_filename.csv', where filename is the original file name. Also, basic morphology metrics (size, elongation, circularity and stain intensity) are tabulated in a separate file for each image called SingleCellMetrics\_filename.csv, where filename is the original file name. Processed images are also created for each image in the input folder, called 'filename\_processed.tif' where the original image is overlaid with cell indices, object outlines (red) and spatial proximity edges (yellow). Cell

indices displayed in the processed images are used in the first column of local metrics and single cell metric files.
