## 1                    **cytoNet: Spatiotemporal Network Analysis of Cell Communities**

2  
3        Arun S. Mahadevan<sup>1</sup>, Byron L. Long<sup>2</sup>, Chenyue W. Hu<sup>4</sup>, David T. Ryan<sup>4</sup>, Nicolas E. Grandel<sup>5</sup>,  
4            Zacharie Maloney<sup>2,3</sup>, George L. Britton<sup>5</sup>, Maria A. Gonzalez Porras<sup>2</sup>, Katerina Stojkova<sup>2</sup>,  
5            Andrew Ligeralde<sup>8</sup>, Hyeonwi Son<sup>9</sup>, John Shannonhouse<sup>9</sup>, Jacob T. Robinson<sup>4, 6</sup>, Aryeh  
6            Warmflash<sup>4,5,7</sup>, Eric Brey<sup>2,3</sup>, Yu Shin Kim<sup>3,9,10</sup> and Amina A. Qutub<sup>2,3\*</sup>

7  
8        <sup>1</sup>Department of Bioengineering, University of Pennsylvania; <sup>2</sup>Department of Biomedical  
9        Engineering, University of Texas, San Antonio; <sup>3</sup>UTSA – UT Health Joint Graduate Group in  
10        Biomedical Engineering; <sup>4</sup>Department of Bioengineering, <sup>5</sup>Systems, Synthetic and Physical  
11        Biology Program, <sup>6</sup>Department of Electrical and Computer Engineering, and the <sup>7</sup>Department of  
12        Biosciences, Rice University; <sup>8</sup>Biophysics Graduate Program, University of California, Berkeley;  
13        <sup>9</sup>Department of Oral & Maxillofacial Surgery, <sup>10</sup>Programs in Integrated Biomedical Sciences,  
14        Translational Sciences, Radiological Sciences, University of Texas Health at San Antonio

15  
16  
17  
18  
19  
20  
21        \*Corresponding author contact information:

22  
23        Amina Ann Qutub, PhD  
24        Director, UTSA – UT Health Joint Graduate Group in Biomedical Engineering  
25        Research Thrust Lead, MATRIX AI Consortium  
26        Department of Biomedical Engineering  
27        Science and Engineering Building, SEB 4.106  
28        1 UTSA Circle, University of Texas  
29        San Antonio, TX 78249  
30        [amina.qutub@utsa.edu](mailto:amina.qutub@utsa.edu)

## 31 **Abstract**

32

33 We introduce cytoNet, a cloud-based tool to characterize cell populations from microscopy  
34 images. cytoNet quantifies spatial topology and functional relationships in cell communities using  
35 principles of network science. Capturing multicellular dynamics through graph features, cytoNet  
36 also evaluates the effect of cell-cell interactions on individual cell phenotypes. We demonstrate  
37 cytoNet's capabilities in four case studies: 1) characterizing the temporal dynamics of neural  
38 progenitor cell communities during neural differentiation, 2) identifying communities of pain-  
39 sensing neurons *in vivo*, 3) capturing the effect of cell community on endothelial cell morphology,  
40 and 4) investigating the effect of laminin  $\alpha 4$  on perivascular niches in adipose tissue. The  
41 analytical framework introduced here can be used to study the dynamics of complex cell  
42 communities in a quantitative manner, leading to a deeper understanding of environmental effects  
43 on cellular behavior. The versatile, cloud-based format of cytoNet makes the image analysis  
44 framework accessible to researchers across domains.

45

## 46 **Availability and Implementation**

47 [OutubLab.org/how](https://outublab.org/how) | cytoNet contact: [cytoNetProject@gmail.com](mailto:cytoNetProject@gmail.com)

48 Brain Initiative Alliance Toolmaker cytoNet site:

49 <https://www.braininitiative.org/toolmakers/resources/cytonet/>

50

## 51 **Author / Lay Summary**

52

53 cytoNet provides an online tool to rapidly characterize relationships between objects within images  
54 and video frames. To study complex tissue, cell and subcellular topologies, cytoNet integrates  
55 vision science with the mathematical technique of graph theory. This allows the method to  
56 simultaneously identify environmental effects on single cells and on network topology. cytoNet  
57 has versatile use across neuroscience, stem cell biology and regenerative medicine. cytoNet appli-  
58 cations described in this study include: (1) characterizing how sensing pain alters neural circuit  
59 activity, (2) quantifying how vascular cells respond to neurotrophic stimuli overexpressed in the  
60 brain after injury or exercise, (3) delineating features of fat tissue that may confer resistance to  
61 obesity and (4) uncovering structure-function relationships of human stem cells as they transform  
62 into neurons.

## 63 **Introduction**

64  
65 Discoveries in biology increasingly rely on images and their analysis (3). Advances in microscopy  
66 and accompanying image analysis software have enabled quantitative description of single-cell  
67 features including morphology, gene and protein expression at unprecedented levels of detail (4-  
68 7). There has also been a growing appreciation of spatial and density-dependent effects on cell  
69 phenotype. Various types of cell-cell interactions including juxtacrine and paracrine signaling are  
70 an integral part of biological processes that affect the behavior of individual cells. In response to  
71 this realization, many research groups have developed *in situ* profiling techniques to extract highly  
72 multiplexed single-cell data while preserving the spatial characteristics of biological samples (4,  
73 8-12).

### 74 75 ***Need for a user-friendly tool to test biological hypotheses that depend on spatial information***

76  
77 The increasing prevalence of spatially detailed imaging datasets has led to the proliferation of  
78 spatial analysis pipelines for biological research (**Table 1**). While these methods have enabled  
79 principled exploration of spatial hypotheses, the majority of the pipelines (with a few exceptions)  
80 have been developed for spatial molecular expression data obtained through methods such as mass  
81 cytometry, specialized high-resolution imaging, and/or scRNA-seq, with inherent idiosyncrasies.  
82 Others have focused on histology and samples obtained for medical applications. As a result, these  
83 techniques are not applicable to many standard imaging datasets obtained through routine  
84 biological experiments. Further, many pipelines require the user to be familiar with programming  
85 and involve the use of customized scripts. All of these limitations mean the most advanced spatial  
86 analysis platforms are not commonly employed by biologists. Instead, the spatial analysis  
87 platforms are largely used by a subset of labs heavily invested in computational analysis, by core  
88 users of specialized microscopy, or by imaging experts themselves. There remains a need for a  
89 generalizable, easy-to-use analysis method to test spatial hypotheses applicable to a wide variety  
90 of biological imaging data.

91  
92  
93

94 *Need to capture time-dependency in structure-function relationships*

95

96 In addition to spatial and morphological characteristics, time-dependent properties of cell function  
97 also define phenotype. The behavior of cell groups often includes coordinated responses of  
98 subgroups (such as in brain and heart tissue) that require intricate communication, and the role a  
99 cell plays in this communication is part of its phenotype. Live reporters and activity-based dyes  
100 can provide insight into this time-dependent cell communication. As an example, calcium imaging  
101 is a versatile technique to investigate the dynamics of cell signaling, particularly in neural and  
102 cardiac tissue. While there exist many automated tools for calcium signal analysis (**Table 2**),  
103 combined analysis of spatial and functional topology has the potential to reveal fundamental  
104 insight into the nature of structure-function coupling in biological systems.

105

106 *Network science framework*

107

108 A single modeling framework to represent multiple descriptors of cell community is necessary to  
109 provide continuity across spatial and temporal scales. Network science offers this modeling  
110 framework. Network science seeks to understand complex systems by representing individual  
111 functional units of the system as nodes and their relationships as edges. This abstract representation  
112 is then used to describe, explain or predict the behavior of the system (13). Network models have  
113 been tremendously useful in studying complex biological systems, most prominently in  
114 neuroscience (13, 14). We posit that network models provide a flexible, intuitive method to model  
115 spatial and functional cell community relationships. Among existing image-based analyses that  
116 employ network science, the cell-graph technique (15) has been employed to great effect in  
117 analyzing structure-function relationships in fixed tissue sections. Our early work applying  
118 network analysis to fixed samples also enabled rapid classification of cell phenotypes (16, 17).  
119 However, the scope of network models in describing cell community structure and dynamics has  
120 yet to be fully explored.

121

122 Here we introduce cytoNet, a user-friendly method to analyze spatial and functional cell  
123 community structure from microscope images, using the formalism of network science (**Figure**  
124 **1**). cytoNet is available as a web-based interface run on Amazon cloud. Users can choose to

125 analyze image files from their desktops or online servers. Coupled with its ease-of-use, cytoNet's  
126 versatility makes it accessible to researchers across domains. We originally designed the network  
127 modeling approach to study populations of developing neurons (2) and characterize how vascular  
128 cells respond to neurotrophic factors (16, 17). Here we extend the approach to case studies in a  
129 number of other biological systems. We partnered with labs from across research domains to  
130 illustrate applications of the cytoNet platform to stem cell biology, tissue engineering, and  
131 neuroscience in both *in vitro* and *in vivo* settings. The case studies demonstrate the broad utility of  
132 the network modeling approach in studying spatial and functional community structure in complex  
133 biological systems.

## 134 **Results**

135

136 The cytoNet pipeline enabled us to investigate spatial and functional topology of cell communities  
137 in a variety of biological systems. Four case studies are described in the sections below.

138

### 139 ***Case Study 1: Spatial and functional dynamics of neural progenitor cells (NPCs) during neural*** 140 ***differentiation***

141

142 We designed an *in vitro* model of neural differentiation to analyze the dynamics of spatial and  
143 functional topology during formation of neural circuits from neural progenitor cells (NPCs)<sup>12</sup>.  
144 NPCs are known to display structured intercellular communication prior to formation of synapses,  
145 which plays an important role in controlling self-renewal and differentiation (18-20). By  
146 leveraging the cytoNet method, we sought to capture the dynamic structure of NPC communities  
147 and the effect of such community structure on the phenotypes of individual cells.

148

149 In this case study, we describe data obtained using ReNCell VM human neural progenitor cells, in  
150 which spontaneous differentiation was triggered through withdrawal of growth factors, leading to  
151 rapid cell cycle exit and formation of dense neuronal networks in 5 days (2). We captured  
152 spontaneous calcium activity at days 1, 3, and 5 after withdrawal of growth factors. Following  
153 calcium imaging, cells were fixed, and nuclei were stained and reimaged. Nuclei images were then  
154 manually aligned by fiducial markers with their corresponding calcium images. The paired image  
155 sets allowed the creation of both functional and spatial graphs for the same communities of cells.

156

157 Spatial type II graphs (**Figure 2a**) showed a rise and fall in global network efficiency during neural  
158 differentiation (compared to randomized null models in which edges were rewired while  
159 preserving degree distribution; **Figure 2b**). We hypothesize that these trends, independently  
160 confirmed in multiple NPC lines (2), reflect a transition from topologies favoring global to  
161 hierarchical information flow. We further explored this possibility through calcium imaging.  
162 Functional networks constructed from spontaneous calcium activity (**Figure 2c**) revealed network-  
163 wide signal correlations, with trends in spontaneous network activity mirroring spatial network  
164 parameters (**Figure 2d**). These results suggest that spatial topology predicts functional

165 communication patterns in differentiating NPCs, with high spatial network efficiency at  
166 intermediate time points facilitating network-wide communication and low spatial network  
167 efficiency at early and late time points mirroring more clustered communication.

168

169 We next studied the role of cell-cell communication on cell cycle regulation of NPCs. Cell cycle  
170 regulation in NPCs is of interest as it has implications for the genetic basis of brain size in different  
171 species (21) and aberrant regulation can cause diseases like microcephaly (22). Studies in the  
172 ventricular zone of the embryonic mouse neocortex have shown that clusters of clonally-related  
173 neural progenitor cells go through the cell cycle together (23, 24). However, it is unclear whether  
174 this community effect is a ubiquitous feature of neural progenitor cells. To this end, we employed  
175 the cytoNet workflow to determine whether cell cycle synchronization is a feature of  
176 differentiating NPCs cultured in vitro.

177

178 For this part of the investigation, ReNCell VM human neural progenitor cells were stably  
179 transfected with the FUCCI cell cycle reporters (25) to generate Geminin-Venus/Cdt1-  
180 mCherry/H2B-Cerulean (FUCCI-ReN) cells. We captured time-lapse movies of FUCCI-ReN cells  
181 after withdrawing growth factors to induce differentiation and built network representations from  
182 nucleus images. Adjacency was determined by comparing centroid-centroid distance to a threshold  
183 (type II graphs).

184

185 In order to evaluate spatiotemporal synchronization in cell cycle, for each individual cell in a  
186 frame, we evaluated the average fraction of neighboring cells in a similar phase of the cell cycle  
187 (G1 phase – mCherry+ and S/G2/M phases – Venus+), normalized by total fraction of that cell  
188 type in the population. We called the average value of this fraction across all cells in an image the  
189 neighborhood similarity score,  $N_S$ . Frames from time-lapse movies for low- and medium-density  
190 cultures are shown in **Figure 2e** (see also **Supplementary Videos 1-4**). We observed that groups  
191 of cells in the low-density culture moved through the cell cycle in unison, which was reflected in  
192 periodically high values of the neighborhood similarity score (**Figure 2f, Supplementary Video**  
193 **1-2**). In contrast, the composition of cell clusters in the medium density culture was relatively  
194 heterogeneous, resulting in relatively low values of the neighborhood similarity score over time  
195 (**Figure 2g, Supplementary Video 3-4**). Neighboring cells in very low-density cultures are likely

196 to be derived from the same clonal lineage, which explains the high level of synchronization in  
197 these cultures (23). This example highlights how cytoNet can be used to derive insight into the  
198 role of cell-cell interactions on dynamic cell behavior.

199

## 200 ***Case Study 2: Dynamics of Coupled Functional & Spatial Analysis In Vivo***

201

202 *In vivo* calcium analysis is an avenue for exploring and understanding the role that individual cells  
203 of the nervous system play in processing external stimuli including pain. Pain is mainly mediated  
204 by a subset of primary sensory neurons known as nociceptors in Dorsal Root Ganglia (DRG) and  
205 Trigeminal Ganglia (TG) (26). How DRG neurons function at a population level under  
206 physiological and pathological conditions is unknown. Imaging methods developed to record from  
207 hundreds to thousands of neurons simultaneously in the brains of live mice are helping elucidate  
208 this (27, 28). To investigate population characteristics of pain-sensing neurons, we used cytoNet  
209 to evaluate spatial and functional networks from calcium image sequences obtained in a mouse  
210 DRG model.

211

212 Calcium image sequences, along with single masks identifying individual cells, were inputs to  
213 cytoNet (see Methods for details on generation of masks) (**Figure 3**). Sensory stimulation  
214 experiments produced a single, major signal spike in each segmented cell (27). Measurement of  
215 the magnitude ( $\Delta F/F_0$ ) of each spike is sensitive to the quality of segmentation; to mitigate this,  
216 we characterized each cell not by its spike magnitude, but by the time a cell took to reach its peak  
217 value from 20% of that value (ramp-up) and the time needed for the signal to return to 20% (ramp-  
218 down). Inspection of 44 segmented cells revealed 6 unique combinations of ramp-up times and  
219 ramp-down times (**Figure 3b**). Ramp-up times were either 5 or 10 seconds while ramp-down times  
220 varied between 5 and 35 seconds. This categorization of cells according to functional similarity  
221 was combined with the spatial graph of the segmented cells in order to identify spatial patterns of  
222 cells with similar behavior (**Figure 3a**). In addition, we note that although the vast majority of  
223 segmented cells reached their peak intensity at 20 seconds, a small group of cells along the left  
224 side of the tissue peaked at 25 seconds suggesting a right-to-left wave of response (**Figure 3**). This  
225 case study highlights the utility of cytoNet in analyzing spatial patterns of neural populations with  
226 unique functional signatures in an *in vivo* model.



227 ***Case Study 3: Disentangling the effect of cell community and growth factor stimulation on***  
228 ***endothelial cell morphology***

229  
230 In a second application to studying human cells *in vitro*, we used cytoNet to evaluate the relative  
231 influence of local neighborhood density and growth factor perturbations on endothelial cell  
232 morphology. From a regenerative medicine perspective, studying the morphological response of  
233 endothelial cells to neurotrophic stimuli can help assess the cells' potential angiogenic response  
234 following brain injuries that induce the secretion of neurotrophic factors, like ischemic stroke or  
235 transient hypoxia (29, 30). Common high-throughput angiogenic assays focus on migration and  
236 proliferation as the main cell processes defining angiogenesis, or the growth of new capillaries  
237 from existing ones (31). Distinct morphology and cytoskeletal organization of endothelial cells  
238 indicate the cell's migratory or proliferative nature, and hence their angiogenic contribution within  
239 a sprouting capillary (32). Reproducibly quantifying the morphological response of endothelial  
240 cells to neurotrophic factors would enable more targeted approaches to enhancing brain  
241 angiogenesis.

242  
243 We took an image-based approach to this problem, building a library of immunofluorescence  
244 images of human umbilical vein endothelial cells (HUVECs) stained for cytoskeletal structural  
245 proteins (actin,  $\alpha$ -tubulin) and nuclei, in response to various combinations of vascular endothelial  
246 growth factor (VEGF) and brain-derived neurotrophic factor (BDNF) treatment. Cell morphology  
247 was annotated using 21 metrics described in our previous study (33) (**Supplementary Table 1**),  
248 which included cell shape metrics like circularity and elongation, and texture metrics for  
249 cytoskeletal stains such as actin polarity, smoothness etc. Network representations were designated  
250 based on shared cell pixels (type I graphs) and local network properties were described using the  
251 metrics in **Table 3**.

252  
253 First, we quantified density-dependent effects on endothelial cell morphology in control cultures  
254 (without any growth factor perturbation). Our analysis showed correlations between cell  
255 morphological features and local network properties (**Supplementary Figure 3**). Some of these  
256 relationships were expected, for instance the positive correlation between shared cell border and  
257 cell size. Other relationships, such as the negative correlation between cell circularity and

258 closeness centrality, capture intuitive notions of the influence of cell packing on morphology  
259 (**Figure 4a-c**). The closeness centrality of a cell (**Table 3**) describes its relative position in a colony  
260 – cells in the middle of a colony will have higher centrality values than cells at the edge of a colony  
261 or isolated cells. The negative relationship between circularity and closeness centrality implies that  
262 isolated cells and cells located at the edge of colonies are more likely to have a circular  
263 morphology, while cells located at the center of colonies tend to be less circular (**Figure 4a-c**).  
264 Thus, our analysis revealed that local network properties have a quantifiable effect on cell  
265 morphology.

266  
267 To determine dominant cell phenotypes, we performed cluster analysis on our dataset consisting  
268 of 25,068 cells. This analysis revealed 3 major categories of endothelial cells, with unique  
269 morphological and network signatures (**Figure 4d-e**). Cluster 1 comprised cells with migratory  
270 features, including low circularity and intermediate centrality indicative of their position at the  
271 edges of colonies. Cluster 2 contained small, circular cells with low centrality indicative of their  
272 isolation. Cells in cluster 3 showed proliferative features with large non-circular shapes, and high  
273 centrality indicating their positions in the center of colonies. Through this cluster-based  
274 phenotyping, we show how cytoNet can be used to infer the local environment and topological  
275 arrangement of distinct cell categories within a culture.

276  
277 Next, we developed a workflow to analyze the effect of growth factor treatments on cell  
278 morphology, while correcting for the effect of local network properties. We did this to infer the  
279 independent effects of chemical perturbation and local cell crowding on cell morphology. First,  
280 we applied a quantile multidimensional binning approach (34, 35) to calculate the variance in  
281 morphology metrics that could be individually explained by all local network metrics and growth  
282 factor treatments (**Figure 4f**). We then calculated the values for each morphology metric after  
283 correcting for the effect of local network metrics (see Methods). The raw and network-corrected  
284 values for two metrics, cell size and mean actin intensity, are shown in **Figure 4g-h**. The influence  
285 of network properties can be clearly seen on cell size, where at 6 hours, large cell sizes are seen in  
286 the uncorrected but not corrected plots (**Figure 4g**). The effect of growth factor treatment can be  
287 clearly seen in network-corrected mean actin intensity (**Figure 4h, Supplementary Table 3**),  
288 where VEGF and BDNF treatment have dose-dependent effects on mean actin intensity

289 independent of cell crowding effects. Thus, this case study demonstrates the utility of cytoNet in  
290 detecting the independent effects of local cell crowding and growth factor perturbations on cell  
291 morphology.

292

#### 293 *Case Study 4: Spatial Analysis of the Pericapillary Niche in Adipose Tissue*

294

295 In a second illustration of cytoNet's utility to analyze intact tissue, we used cytoNet to characterize  
296 the pericapillary niche within adipose tissue. Specifically, we sought to understand the role of  
297 laminin  $\alpha 4$ , an extracellular matrix glycoprotein, in adipose tissue. Mice with a null mutation in  
298 the laminin  $\alpha 4$  gene exhibit resistance to obesity and enhanced insulin sensitivity (36, 37).  
299 Understanding how the deletion of laminin  $\alpha 4$  affects the spatial distribution of cells present in the  
300 adipose tissue can provide insight into the mechanisms underlying the functional change, and  
301 guide biomimetic models of the adipose perivascular niche (1, 38, 39). In this Case Study example,  
302 the confocal images of adipose tissue and capillaries were segmented by manual tracing on the  
303 computer, and provided as input to cytoNet. Because blood vessels have noncircular shapes, the  
304 distance between the centroids of vessels and other objects may not give a good sense of proximity.  
305 As an alternative graph-generation approach, cytoNet can compute the minimum distance between  
306 object perimeters in order to define graph edges. The resulting cell-to-cell perimeter distance table  
307 and cell area computations were used to determine differences between wild-type and knockout  
308 cells (**Figure 5**). The observed adipocytes stained with the BODIPY lipid dye tended to be smaller  
309 in knockout tissue compared to wild type (**Figure 5c**). This characterization is consistent with the  
310 observation that adipose in knockout mice is more similar to beige adipose tissue. In addition, we  
311 observed numerical differences in the "distance to capillary" metric for integrin  $\alpha 7$  expressing cells  
312 between the laminin  $\alpha 4$  knockout and wild-type mice models (**Figure 5f**), though for the limited  
313 sample size they were not statistically significant. Overall, these observations align with findings  
314 that the absence of laminin  $\alpha 4$  leads to changes in stromal cell structure and distribution in  
315 pericapillary niches within adipose tissue (1). The resulting data can be used to guide studies into  
316 understanding the mechanisms underlying the effect of laminin  $\alpha 4$  on adipose tissue function.  
317 Thus, this case study demonstrates the utility of cytoNet in detecting regional variations of cell  
318 structure within tissues and in addressing testable spatial hypotheses about tissue function.

## 319 Discussion

320

321 Advances in *in situ* profiling techniques have led to the generation of highly multiplexed imaging  
322 datasets describing tissue architecture in great spatial detail (4, 8-12). Spatially detailed imaging  
323 datasets have led to a proliferation of computational pipelines designed to test spatially driven  
324 biological hypotheses (**Table 1**). However, many of these analysis pipelines are designed  
325 specifically for spatial molecular expression data and are not generalizable to data obtained from  
326 other microscopy techniques. Further, due to their reliance on specialized scripts, many pipelines  
327 are not readily accessible to biological researchers without programming background.

328

329 Here we present cytoNet, a user-friendly pipeline for investigation of spatial hypotheses in cell-  
330 and tissue-based biological experiments. cytoNet is available through an intuitive web interface,  
331 eliminating the need to download and install software. Source code is also provided as MATLAB  
332 scripts for more advanced users. Pre-segmented masks provided as input to cytoNet are used to  
333 build network representations of spatial topography. Accompanying fluorescence or confocal  
334 images are used to extract single-cell features and functional relationships. Lastly, network  
335 descriptors are combined with single-cell features to explore cell community effects on cell  
336 phenotypes.

337

338 We demonstrate the utility of cytoNet through four case studies. As shown in detail in our previous  
339 study (2), we harness an *in vitro* model of neuronal network formation from neural progenitor cells  
340 (NPCs) to demonstrate a rise and fall in network efficiency during neural differentiation.  
341 Accompanying functional network analysis through calcium imaging shows that these trends in  
342 community structure likely reflect a transition from global to hierarchical communication during  
343 the formation of neural circuits. We further use local neighborhood measures to explore the effect  
344 of cell community on cell cycle regulation, showing a density-dependent effect on cell cycle  
345 synchronization.

346

347 Our second case study showed cytoNet's capability for analyzing time-varying functional image  
348 sets. In this case, we characterized spatiotemporal calcium signaling recorded from intact brain  
349 tissue. Networks can be constructed based on the similarity of temporal behaviors of cells. The

350 combination of the functional networks and spatial networks reveals local groups of cells with  
351 similar behaviors and assists in the development and testing of hypotheses of functional  
352 subsystems in neuronal tissue.

353

354 We also explored the differential effects of cell density and growth factor stimulation on human  
355 endothelial cells using cytoNet. By applying unsupervised clustering approaches on a suite of  
356 cytoNet-generated metrics describing cell morphology and local neighborhood, we show the  
357 presence of three cell phenotypes. These phenotypes reflect different cytoskeletal states and  
358 multicellular interactions indicative of collective behaviors like migration and proliferation.  
359 Further, we leverage a quantile multidimensional binning approach to investigate the differential  
360 effects of cell density and growth factor perturbations on cell morphology. This workflow can be  
361 used to comprehensively characterize the response of cells to chemical perturbations and aid in  
362 drug discovery. Case Study 4 illustrated another translational application of cytoNet: this time to  
363 study the effect of an extracellular matrix protein on the phenotype of adipose cells within  
364 perivascular niches.

365

366 Notably, two of the case studies were applied *in vitro* to human cells, and two were applied to *in*  
367 *vivo* image sets. Case Study 1 and 2 capitalized on cytoNet's ability to integrate functional and  
368 structural graphs across time in a single mathematical framework. The other two cases illustrated  
369 the how cytoNet can be applied to optimize cell phenotyping (Case Study 3 and 4). All of the cases  
370 show how cytoNet can help guide hypotheses, inform biomimetic models or tailor therapeutic  
371 interventions that reflect a cell's microenvironment.

372

373 The network model utilized by cytoNet is a versatile modeling framework that can be used to  
374 incorporate many hypotheses on cell-cell interactions and their role in cellular behavior. In future  
375 iterations, this framework can be expanded to incorporate non-binary interactions through  
376 weighted networks, shift the focus from individual nodes to motifs through simplicial complexes,  
377 and include dynamic reconfiguration of networks over time through multilayer networks. Further,  
378 once graphs have been defined, graph theory affords a rich array of metrics that can be used to  
379 probe network structure, only some of which were studied here. These include a variety of null  
380 graph models that can be used to test specific spatial hypotheses.

381

382 In summary, the cytoNet method provides a user-friendly spatial analysis software, leveraging  
383 network science to model spatial topography and functional relationships in cell communities. This  
384 framework can be used to quantify the structure of multi-cellular communities and to investigate  
385 the effect of cell-cell interactions on individual cell phenotypes.

386

## 387 **Methods**

388

### 389 *Software*

390 cytoNet is available as a web-based interface at <https://www.QutubLab.org/how> and associated  
391 scripts are available at <https://github.com/arunsm/cytoNet-master.git>. An overview of cytoNet as  
392 a resource for the Brain Initiative Alliance community is provided here, along with video tutorials:  
393 <https://www.braininitiative.org/toolmakers/resources/cytonet/>

394 See **Supplementary Methods 1** for instructions on using cytoNet.

395

### 396 *cytoNet image analysis pipeline*

397 The cytoNet pipeline begins with masks and accompanying microscope images. The microscope  
398 images may be any color or gray-scale based microscopy images (e.g., immunofluorescence,  
399 confocal) or a sequence of calcium images (**Figure 1a**). The provided mask is used to extract  
400 features of cells and to construct spatial and functional graphs (**Figure 1b**). Spatial graphs are  
401 created by having nodes represent mask objects and edges determined by object distance. Edges  
402 can be found by one of two methods for spatial graphs: by evaluating the distance between cell  
403 boundaries (type I graphs), or by evaluating the proximity of cells in relation to a threshold distance  
404 (type II graphs) (**Figure 1b**). The type I graphs are useful when detailed information of cell  
405 boundaries and morphology is available, such as in the case of membrane stains or cells stained  
406 for certain cytoskeletal proteins. The type II graphs work well with images of cell nuclei, where  
407 detection of exact cell boundaries is not possible. In both approaches, cells deemed adjacent to  
408 each other are connected through edges, resulting in a network representation. If calcium imaging  
409 sequences are provided as input, a functional graph is created based on correlations among calcium  
410 time series of different mask objects (**Figure 1b**).

411

### 412 *Image Segmentation*

413 Image segmentation – the identification of salient foreground objects such as cells – is often the  
414 first step in image analysis. The cytoNet pipeline works with pre-segmented masks of images and  
415 accompanying microscope images. For users who do not have mask files, cytoNet includes basic  
416 image segmentation algorithms including thresholding and watershed operations to generate these  
417 masks. The segmentation algorithms included in cytoNet can be parameterized to work well for

418 images with clear delineation of nuclei and cell borders, like the endothelial cell examples provided  
419 on the cytoNet website. The cytoNet code also provides frequency detection of cells, where a  
420 change in a functional marker (e.g.,  $\text{Ca}^{2+}$  or Fucci) delineates cell location. For object detection  
421 in most other image sets, we point the user to programs that focus on cell segmentation (40-42).  
422 Multiple research teams have made significant inroads into designing generalizable image  
423 segmentation algorithms, among them classic thresholding and watershed approaches (43), pixel-  
424 based classifiers (40) and more recently deep learning approaches (4, 41, 42). These programs  
425 generate masks as output. Users may wish to implement them prior to analyzing community  
426 structure through cytoNet. Image segmentation and graph creation are handled separately by  
427 cytoNet, enabling flexibility for the user.

428

### 429 *Generation of spatial networks*

430 Type I graphs are generated as follows. Mask boundaries are expanded by 2 pixels and overlap of  
431 expanded masks is used to assign edges and build an adjacency matrix. Cells touching the image  
432 border are included in calculations of local network properties (**Table 3**) for cells not touching the  
433 boundary but are excluded for the construction of the adjacency matrix. Type II graphs are  
434 generated as follows: for each pair of objects (nuclei), a threshold distance for proximity is defined  
435 as the average of the two object diameters, multiplied by a scaling factor (S). If the Euclidean  
436 distance between the object centroids is lower than the threshold distance computed, the pair of  
437 objects is connected with an edge. We chose a default scaling factor  $S = 2$  for all our analyses,  
438 through visual inspection of cell adjacency.

439

### 440 *Generation of functional networks*

441 Functional networks are created using the method described by Smedler et al, (44) where cross-  
442 covariance between signals is used to assign functional connections between pairs of cells (**Figure**  
443 **1b**). A randomized dataset is generated by shuffling each signal in the original dataset at a random  
444 time point. The 99<sup>th</sup> percentile of cross-covariance values for the randomized dataset is used as a  
445 threshold for determining significant correlations.

446

447

448



#### 449 *Network Metric Computation*

450 For both spatial and functional graphs, connectivity is denoted mathematically using an adjacency  
451 matrix,  $A$ , where  $A_{i,j} = 1$  if there exists an edge between cells  $i$  and  $j$ , and 0 otherwise. This  
452 concise representation of hypothesized interactions among cells can be used to generate multiple  
453 descriptors at a local level for individual nodes and at a global level for the entire graph (**Figure**  
454 **1c**). Extracted metrics are used to visualize and analyze local neighborhood effects on individual  
455 cell phenotypes (**Table 3**), as well as global cell community characteristics (**Table 4**). Examples  
456 of local metrics are number of connections (degree) or notions of centrality, such as ability to act  
457 as a bridge between different cell communities (betweenness centrality). Examples of global  
458 metrics include measures of modularity such as the number of connected components, and  
459 measures of information flow such as path length. All the network metrics described in **Table 3**  
460 and **Table 4** were computed using custom-written code, building upon routines provided in (45).

461

#### 462 *Cell Culture*

463 Human umbilical vein endothelial cells (HUVEC) were obtained from Lonza and cultured in  
464 EBM-2 medium (Lonza) supplemented with penicillin-streptomycin (Fisher Scientific) and EGM-  
465 2 SingleQuot bullet kit (Lonza). For imaging experiments, cells were cultured for different periods  
466 (6, 12 or 24 hours) in different combinations of vascular endothelial growth factor (VEGF, human  
467 recombinant; Millipore) and brain-derived neurotrophic factor (BDNF, human recombinant,  
468 Sigma-Aldrich). Concentrations used were in the range 50-100 ng/ml. Controls were the same  
469 culture period without growth factor treatments.

470

471 Immortalized human neural progenitor cells derived from the ventral midbrain (ReNCell VM)  
472 were obtained from Millipore. Cells were expanded on laminin-coated tissue culture flasks, in  
473 media containing DMEM/F12 supplemented with B27 (both Life Technologies), 2  $\mu$ g/ml Heparin  
474 (STEMCELL Technologies), 20 ng/ml bFGF (Millipore), 20 ng/ml EGF (Sigma) and  
475 penicillin/streptomycin. For differentiation experiments, cells were cultured in medium lacking  
476 bFGF and EGF.

477

478

479

480 ***Dorsal Root Ganglion Mouse Model***

481 Dorsal laminectomies were performed on anesthetized mice exposing the dorsal root ganglia in  
482 the spinal L5 region. The spinal columns were stabilized under a laser-scanning confocal  
483 microscope. Stimuli were applied to the hind paw in one of four ways: 1) pressure (rodent pincher  
484 analgesia meter), 2) gentle mechanical stroke (brush or von Frey filament), 3) thermal stimuli  
485 (immersion in hot or cold water), 4) chemical stimuli (KCl, capsaicin, or TRPV1 agonist applied  
486 subcutaneously). Calcium image sequences were acquired at depths of up to 100  $\mu\text{m}$  at 1-3 Hz at  
487 intervals of 4-6 seconds.

488

489 ***Laminin  $\alpha 4$  Knockout Mouse Model***

490 Subcutaneous fat was separately collected from laminin  $\alpha 4$  knock out mice and wild-type mice.  
491 The samples were processed and incubated with integrin  $\alpha 7$  antibody (1:100, Novus Biologics  
492 NBP1-86118) and Griffonia simplicifolia isolectin conjugated with Rhodamine (labels endothelial  
493 cells/blood vessels) followed by incubation with a second antibody (Alexa Fluor 647 Donkey Anti-  
494 Rabbit IgG, Abcam ab150075) and BODIPY to stain lipid. Images were collected by a Leica TCS  
495 SP8 Confocal Microscope.

496

497 ***NPC calcium image acquisition and processing***

498 ReNCell VM neural progenitor cells were plated on LabTek chambered cover glasses for calcium  
499 imaging experiments. Cells were loaded with culture medium containing 3  $\mu\text{M}$  of the fluorescent  
500 calcium indicator Fluo-4/AM (Life Technologies) and Pluronic F-127 (0.2% w/v, Life  
501 Technologies) for 30 min at 37°C. Imaging of spontaneous calcium activity was performed at 37°C  
502 using a 20X objective lens (N.A. = 0.75), with 488 nm excitation provided through a SOLA SE  
503 Light Engine (Lumencor). 16-bit fluorescence images were acquired at a sampling frequency of 1  
504 Hz for a total duration of 15 min, using a Zyla 5.5 sCMOS camera (Andor). Following calcium  
505 imaging, samples were fixed, and nuclei were stained using DAPI. By navigating to the locations  
506 where calcium imaging was performed, manual co-registration was done to obtain  
507 immunofluorescence images for the same fields of view.

508

509 Regions of interest (ROIs) were obtained by segmenting nucleus images using a local thresholding  
510 approach followed by the watershed algorithm. Undersegmented objects were algorithmically

511 removed by discarding the top two percentile of object sizes obtained after segmentation. Next, a  
512 time-varying fluorescence trace was calculated for each ROI. For each frame in the calcium  
513 fluorescence image stack, background (average pixel intensity of non-ROI regions in the image)  
514 was subtracted. Average fluorescence intensity for each ROI ( $F$ ) was obtained by averaging pixel  
515 intensity values within the ROI for each time point. Baseline fluorescence ( $F_0$ ) for each ROI was  
516 calculated as the minimum intensity value in a window 90s before and after each time point. The  
517 normalized fluorescence trace for the ROI was then calculated as  $F - F_0/F_0$ . Cells with low  
518 activity were filtered out by discarding traces with less than three peaks and traces whose signal-  
519 to-noise ratio was lower than 1. Quality of the remaining traces was confirmed by manual  
520 inspection. This was done to avoid false positives in the cross-correlation analysis.

521

### 522 ***Generation of FUCCI Reporter Neural Progenitor Cell Lines***

523 Stable reporter cell lines (FUCCI-ReN) were generated by sequentially nucleofecting ReNcell VM  
524 neural progenitor cells with an ePiggyBac (46) construct encoding mCherry-Cdt, Venus-Geminin,  
525 or Cerulean-H2B. Each construct introduced to the cells was driven by a CAG promoter  
526 containing a blasticidin (ePB-B-CAG-mCherry-Cdt1), puromycin (ePB-P-Venus-Geminin), or  
527 neomycin (ePB-N-Cerulean-H2B) resistance gene. Following each round of nucleofection, cells  
528 were cultured in the presence of appropriate antibiotics (2  $\mu\text{g}/\text{ml}$  blasticidin, 0.1  $\mu\text{g}/\text{ml}$  puromycin  
529 and 100  $\mu\text{g}/\text{ml}$  neomycin).

530

### 531 ***Acquisition and processing of FUCCI-ReN time lapse videos***

532 FUCCI-ReN cells were plated at different densities on chambered cover glasses (Fisher Scientific)  
533 coated with laminin. Cells were imaged after switching to differentiation medium containing  
534 phenol red-free DMEM/F12. Time-lapse imaging was performed using a Nikon Ti-E microscope  
535 equipped with a motorized stage, a cage incubator for environmental control (Okolab), a 20X  
536 objective lens (N.A. = 0.75), SOLA SE Light Engine for LED-based fluorescence excitation  
537 (Lumencor), appropriate filters for visualizing mCherry, Venus and Cerulean fluorescent proteins  
538 and a Zyla 5.5 sCMOS camera (ANDOR). 16-bit composite fluorescence images were acquired at  
539 10-minute intervals for a total duration of 57.5 hours.

540

541 Grayscale images for each channel (H2B-Cerulean, Geminin-Venus and Cdt1-mCherry) were  
542 binarized using locally adaptive thresholding. Seeds for the watershed transform were generated  
543 using the regional minima from the distance transform of the grayscale images. Next, the  
544 watershed algorithm was applied to detect boundaries between overlapping cell nuclei. Finally,  
545 information from different channels were used to correct undersegmented nuclei (**Supplementary**  
546 **Figure 2**).

547

#### 548 *Acquisition and processing of HUVEC immunocytochemistry images*

549 For imaging experiments, HUVECs were cultured on glass dishes coated with fibronectin (Sigma-  
550 Aldrich). After appropriate growth factor treatments, cultures were fixed with 4%  
551 paraformaldehyde, free aldehyde groups were quenched using 1 mg/mL sodium borohydride, and  
552 membranes were permeabilized with 0.2% Triton-X-100 solution in PBS. Actin fibers were  
553 visualized using an Alexa Fluor 488-phalloidin antibody (1:40, Molecular Probes) and  
554 microtubules were visualized using a mouse monoclonal anti- $\alpha$ -Tubulin antibody (1:250, Sigma-  
555 Aldrich) followed by a goat anti-mouse Alexa Fluor 647 secondary antibody. Nuclei were stained  
556 using Hoescht (Molecular Probes). 16-bit composite immunofluorescence images were acquired  
557 through a 20X objective (N.A. = 0.75) on a Nikon Ti-E epifluorescence microscope. Physical pixel  
558 size was 0.32  $\mu\text{m}$ .

559

560 Fluorescence images were processed as described previously (47) (**Supplementary Figure 1**).  
561 Briefly, the following steps were used.

- 562 1. Contrast was enhanced using histogram equalization.
- 563 2. Images were smoothed using a 2D Gaussian lowpass filter.
- 564 3. Initial binarization was performed using Otsu's method.
- 565 4. The binary image was dilated to fill in individual cell areas.
- 566 5. All objects <1% of the total image area were removed. This was called the final binary  
567 image.
- 568 6. A binary representation of the nuclear and microtubule image layers was generated using  
569 a high input threshold value. This was called the marker image.
- 570 7. Another binary image was created with values of 0 where either the final binary image  
571 (step 5) or the marker image (step 6) had a value of 1.

- 572 8. Watershed markers were generated by imposing the minimum of the complement of  
573 images obtained in steps 2 and 7. This image had black markers contained within cells to  
574 serve as basins for flooding, while cell areas themselves were represented by lighter pixels  
575 that served as the rising contours of the basins.
- 576 9. The watershed algorithm was implemented using Matlab's built-in function to generate  
577 cell boundaries.
- 578 10. Masks generated in step 9 were refined by using composite images of microtubules and  
579 actin as the marker image (step 6).

580 In order to automate the threshold generation, the area of cell masks obtained from segmentation  
581 were compared to those obtained through thresholding with a high threshold. The entire process  
582 was then iterated until an acceptable area ratio was achieved.

583

### 584 *Processing of In Vivo Calcium Image Sequences*

585 Calcium image sequences from dorsal root ganglion models were processed as follows. To  
586 generate a mask, the calcium image sequence was first decomposed into individual grayscale  
587 frames. Next, for each pixel location, the maximum and minimum intensities were found across  
588 all frames. The differences between the maximum and minimum intensities were stored in an array  
589 (of delta values) and normalized. An initial segmentation of the delta values was done by  
590 thresholding using Otsu's method, resulting in an initial binary mask. The initial mask was refined  
591 by computing a new threshold by applying Otsu's method to only those delta values that were  
592 identified as foreground objects in the initial segmentation. The resulting binary image underwent  
593 a morphological closing with a disk of radius 3, and objects of fewer than 10 pixels were removed  
594 to generate the final mask.

595

596 To generate functional networks, edges were placed between two cells whenever: a) the two cells  
597 had the same ramp-up and ramp-down times, and b) the Euclidean distance between the centroids  
598 of the two cells was less than or equal to 10 times the mean of the diameter of each of the two  
599 cells.

600

601

602

603 ***Cluster Analysis***

604 We performed cluster analysis on the HUVEC imaging dataset using Shrinkage Clustering (48), a  
605 two-in-one clustering and cluster optimization algorithm based on matrix factorization that  
606 simultaneously finds the optimal number of clusters while partitioning the data. Cells whose  
607 features had the smallest sum of squares distance to the median values for each cluster were  
608 identified as representative cells for each cluster.

609

610 ***Correction of Morphology Metrics for Effects of Local Network Properties and Treatment***  
611 ***Conditions***

612 We performed quantile multidimensional binning (49) of cells for all 7 network metrics (5 bins  
613 per metric). The mean of each morphology metric was calculated for each multidimensional bin,  
614 and this mean was subtracted from the raw measurements to generate the network-corrected  
615 measurements for each cell. Treatment-corrected measurements were generated similarly by  
616 calculating the mean of each morphology metric under each treatment condition and then  
617 subtracting it from the raw measurements.

618

619 ***Variance Explained by Local Network Properties and Treatment Conditions***

620 The variance explained by each factor was calculated using the following formula (35)

621 
$$1 - V_{corr}/V_{uncorr}$$

622  $V_{corr}$  is the variance of the corrected measurements, and  $V_{uncorr}$  is the variance of the uncorrected  
623 measurements.

624 **Acknowledgements**

625

626 We thank Dr. David Noren, Dr. André Schultz and Dr. Tien Tang for helpful discussions and  
627 comments on the manuscript, and Amada Abrego, Dr. Becky Zaunbrecher and Grace Ching for  
628 technical assistance. We also thank the Brain Alliance Initiative for curating cytoNet as a resource  
629 for the research community, the Keystone Symposia for highlighting cytoNet as a virtual SciTalk  
630 resource. This work was supported by NSF Career Grant 1150645 to AAQ, NSF Neural and  
631 Cognitive Systems grant 1533708 to AAQ and JTR, NSF award 1553228 to AW, CPRIT award  
632 RR140073 to AW, and National Institutes of Health Grant RO1DE026677 and UT Rising STAR  
633 Award to YSK. ASM was supported through NSF IGERT training grant 1250104.

634

635 **Author Contributions**

636

637 ASM, DTR, EB, YSK and AAQ designed the experiments. ASM, GLB, DTR, MGP, KS, HS and  
638 JS performed the experiments. BLL, ASM, CWH, NEG, ZM and AAQ analyzed the data. BLL,  
639 AL and AAQ designed and implemented the cytoNet website. All authors contributed to writing  
640 the manuscript. AAQ, AW, EB and YSK supervised the work.

641

642 **Competing Financial Interests**

643

644 The authors declare no competing financial interests.

645

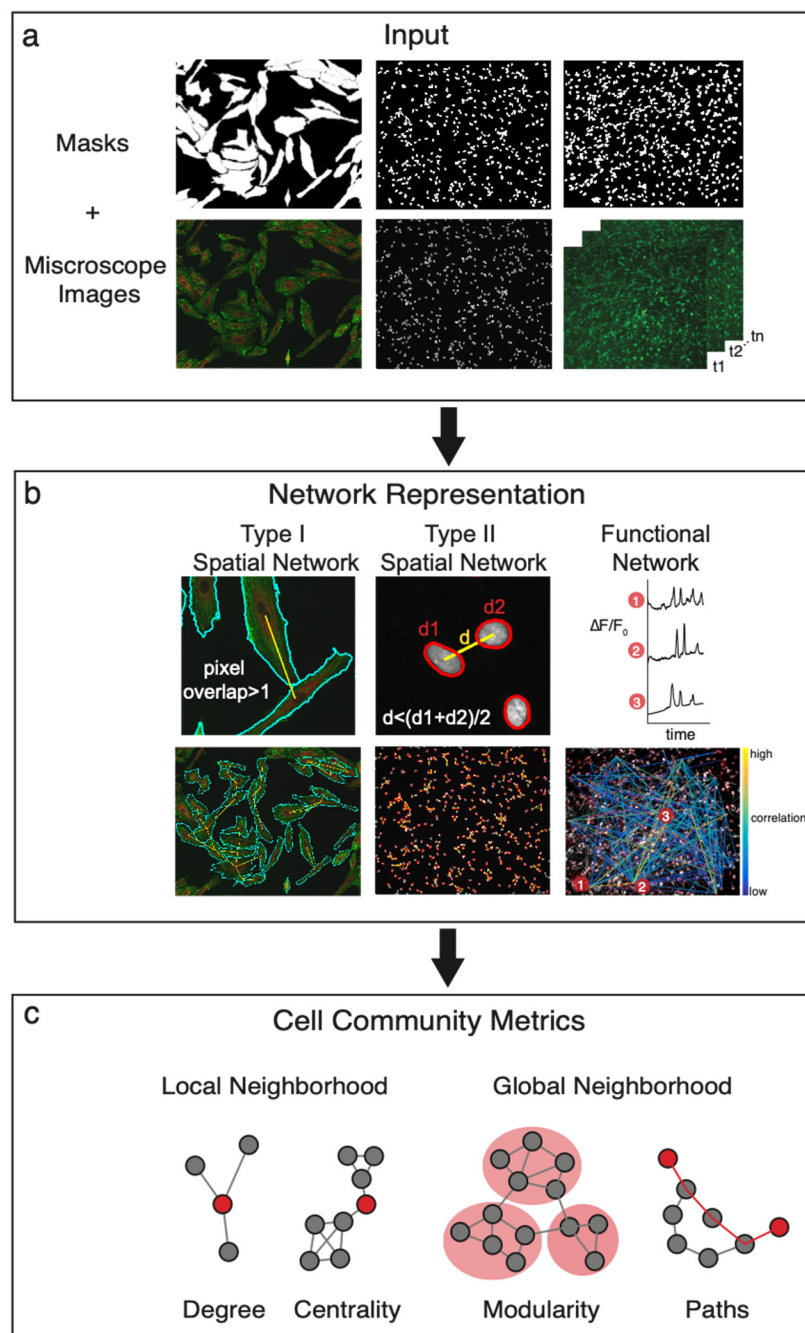

**Figure 1. cytoNet workflow.** (a) The cytoNet pipeline begins with masks and optionally microscope images, which can be static immunofluorescence images or calcium image sequences. (b) Spatial proximity is determined either by measuring shared pixels between cell pairs – type I networks, or by comparing the distance between cell centroids to a threshold distance – type II networks (right panel). Functional networks are estimated from correlations in calcium time series data. (c) Cell community descriptors provide information on local neighborhood characteristics of individual cells, like degree and centrality measures, and global neighborhood characteristics like modularity and path lengths.



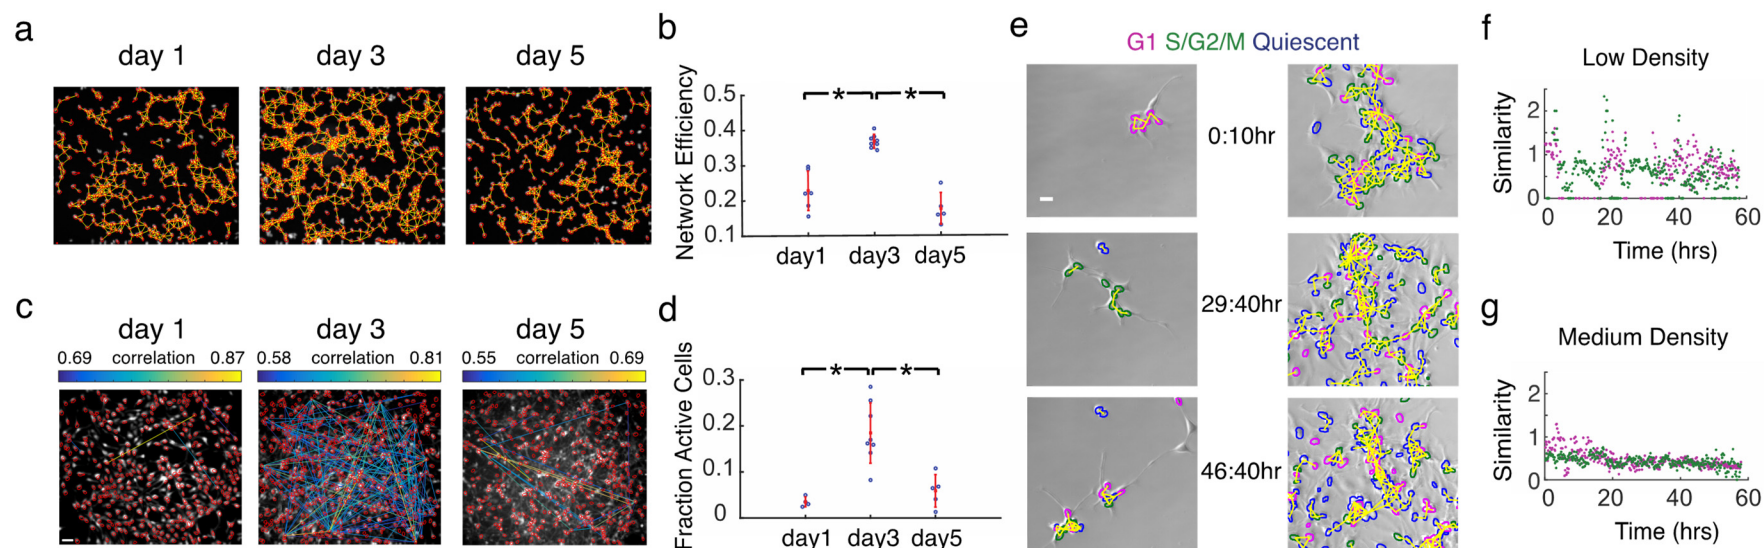

**Figure 2. Dynamics of spatial and functional topology in developing neural progenitor cells (NPCs).** (a) Spatial NPC networks at day 1, 3 and 5 of differentiation, overlaid on immunofluorescence images of nuclei stained with Hoescht dye; segmented cells are outlined in red, and spatial proximity edges are shown as yellow lines. (b) Network efficiency of spatial NPC networks peaks at day 3; red notches show mean and standard deviation; \* $p < 0.005$  from two-sample t-test. (c) Functional networks obtained through calcium imaging with Fluo-4 in developing NPC networks at days 1, 3 and 5. Correlations between calcium traces from individual cells are shown as a network plot overlaid on the maximum intensity image from calcium image sequences; scale bar = 50  $\mu\text{m}$  for panels a and c. (d) Fraction of active cells in the network; \* $p < 0.005$  from two-sample t-test. Active cells are defined as cells whose normalized fluorescence traces have three or more calcium transients. (e) Frames from time-lapse movies of differentiating NPCs transfected with FUCCI cell cycle reporters. Borders of mCherry+ nuclei (G1) are outlined in magenta, Venus+ nuclei (S/G2/M) are outlined in green, and mCherry-/Venus-nuclei (quiescent) are outlined in blue, spatial edges are overlaid in yellow; scale bar = 50  $\mu\text{m}$ . (f) Neighborhood similarity score for low-density culture across time. (g) Neighborhood similarity score across time for medium-density culture. Figures 2a-d adapted from reference (2).

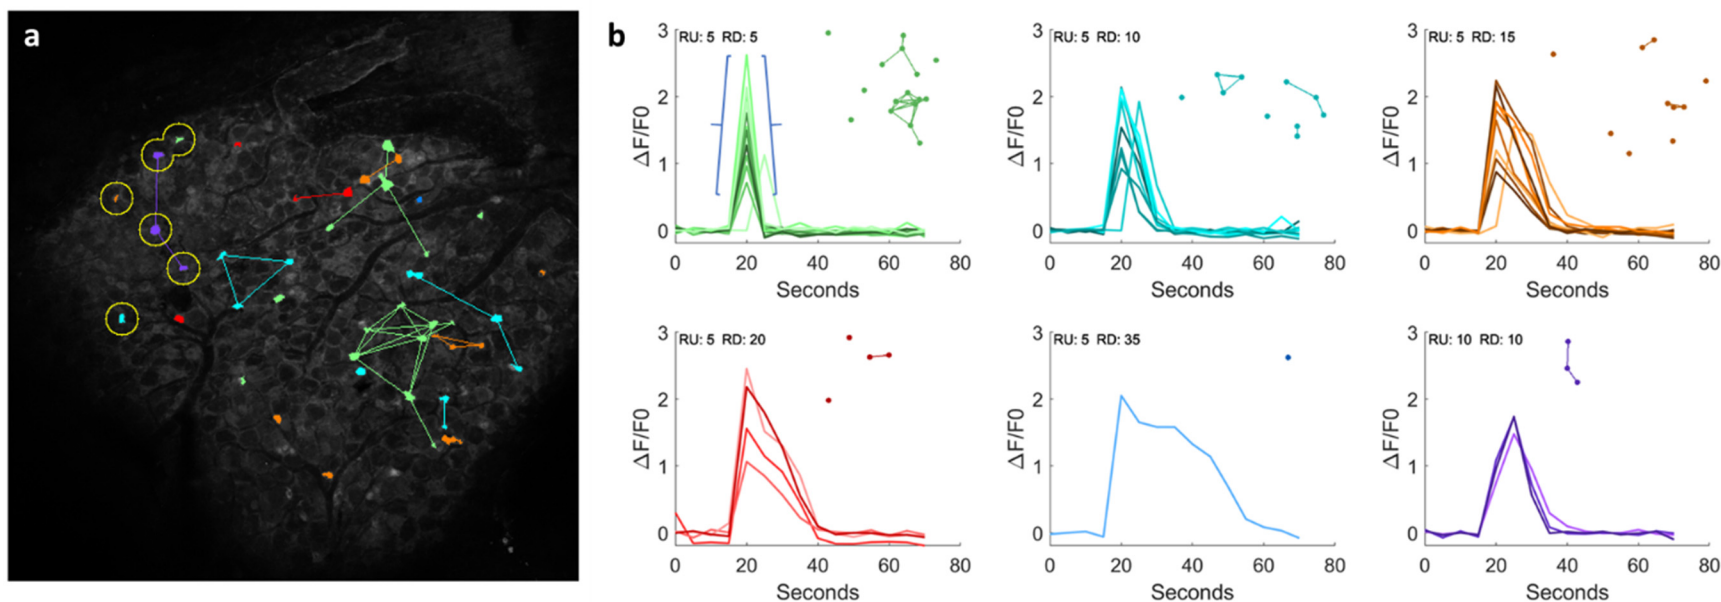

647

**Figure 3. Dynamics of Coupled Functional & Spatial Analysis *In Vivo*.** cytoNet captures relationships between spatial proximity of neurons and functional features of multicellular modules *in vivo*. (a) Cells classified according to the time required to first reach their maximum  $\Delta F/F0$  values from 20% of that value (ramp-up) and the time required to return to 20% (ramp-down). Edges connect similarly classified cells that are within 10 cell diameters of each other. All cells reached their peak values at 20 seconds except for those circled which reached their peak values at 25 seconds. (b) Calcium time series ( $\Delta F/F0$ ) plotted for 6 categories of cells with unique combinations of ramp-up and ramp-down times. The blue braces indicate a cell's ramp-up and ramp-down. Each inset image is a spatial pattern of cells with the same ramp-up and ramp-down times. RU = ramp-up time; RD = ramp-down.

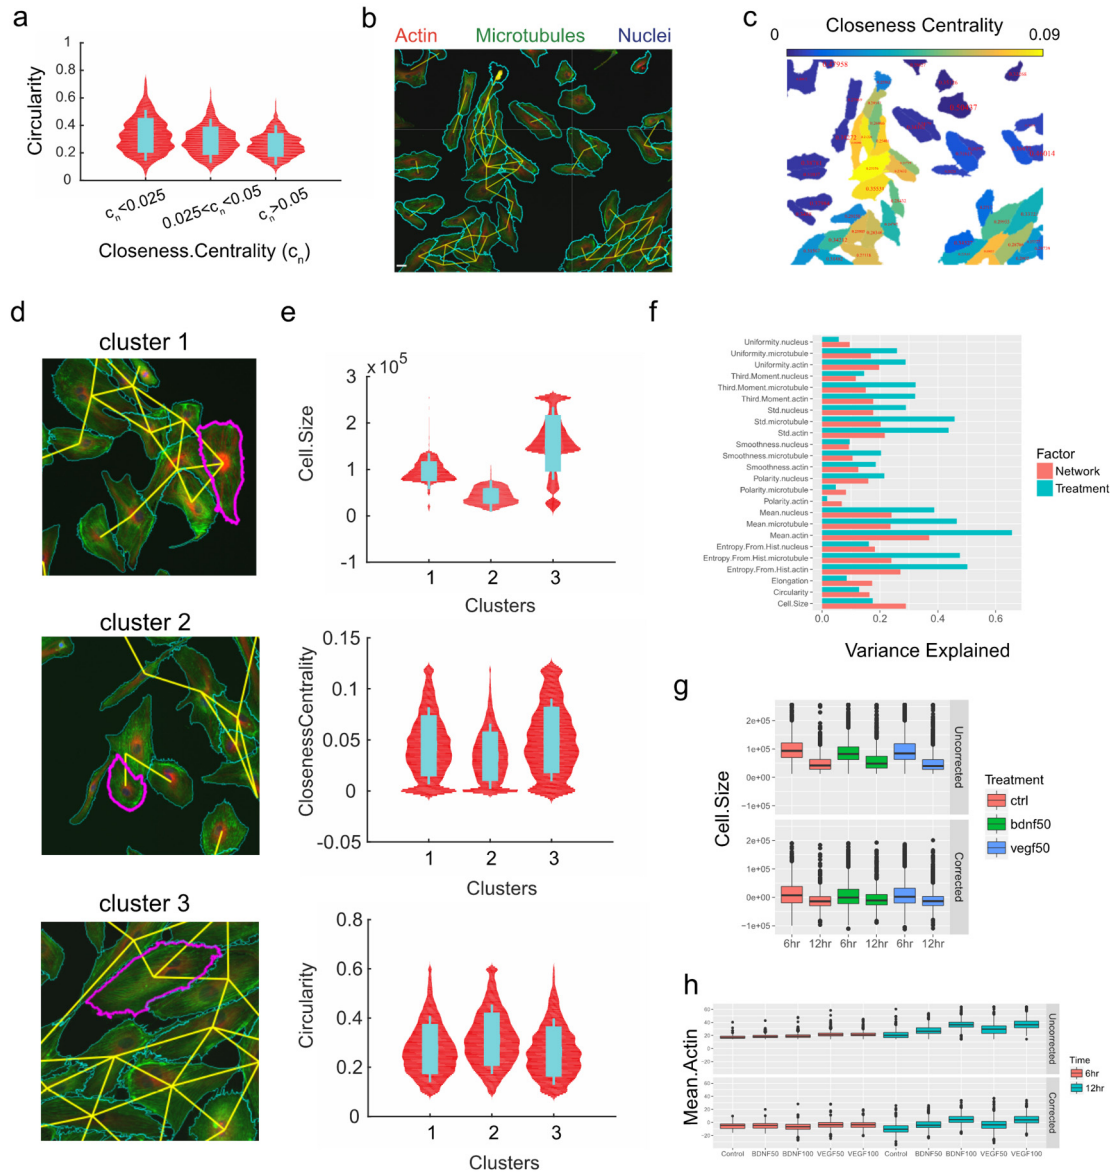

648

**Figure 4. Influence of local neighborhood density on primary human endothelial cell (HUVEC) morphology.** (a) Distribution of cell circularity values grouped under different levels of closeness centrality; sample size,  $n=786$  cells (group 1;  $c_n < 0.025$ ), 741 cells (group 2;  $0.025 < c_n < 0.05$ ) and 782 cells (group 3;  $c_n > 0.05$ ); Cohen's  $d$  effect size: groups (1, 2) = 0.34, groups (1, 3) = 0.62 (b) Sample immunofluorescence image with graph representation overlaid; scale bar = 50  $\mu\text{m}$ . (c) Heatmap depicting closeness centrality of each cell, with circularity values overlaid in text. (d) Representative cells from cluster analysis, highlighted in magenta. (e) Cell size, closeness centrality and circularity distribution plots for each cluster. (f) Bar plot of variance explained by growth factor treatment and local network metrics. (g) Box plot of cell size as a function of growth factor treatment. (h) Box plot of mean actin intensity as a function of growth factor treatment. Legends and axes in (f-h) contain information on treatment (BDNF, VEGF), concentration (50ng/ml, 100ng/ml) and time of treatment (6 hours and 12 hours). Cohen's  $d$  effect size for (f-h) is shown in **Supplementary Table 2**.

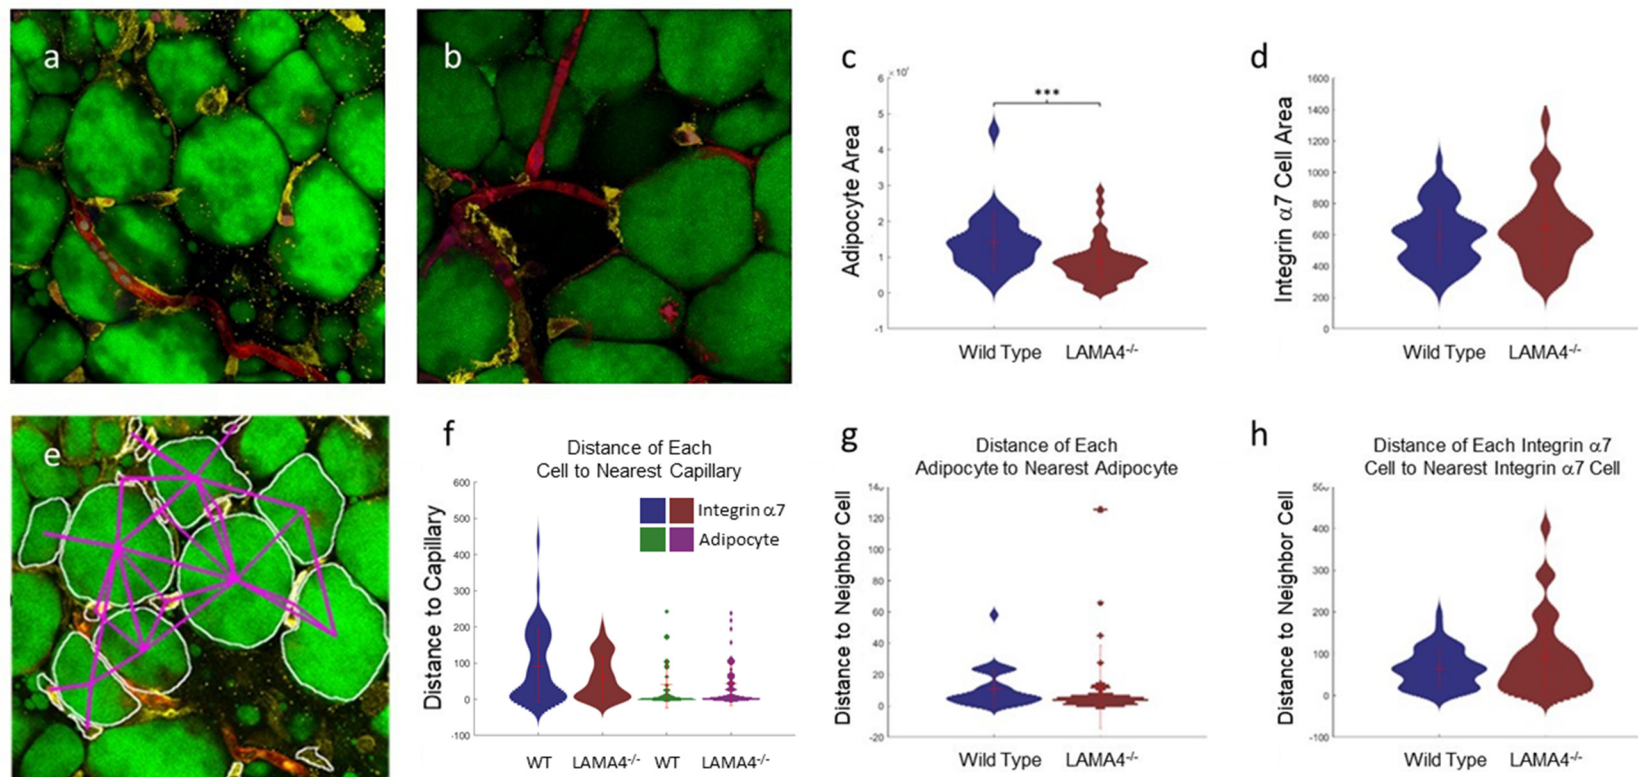

649  
650

**Figure 5. Spatial Analysis of the Pericapillary Niche in Adipose Tissue.** Example confocal images of wild type (a) and knock out (b) adipose tissue and the corresponding output graph for the wild type image (e). Red = lectin (capillaries). Green = Bodipy (adipocytes). Yellow: integrin α7 positive cells. Violin plots of cell properties comparing wild-type and knockout (c, d, f-h). Distances are measured between the closest border pixels of pairs of objects. Figure 5f is adapted from reference (1). Error bars are mean +/- standard deviation. p-values were computed using the Wilcoxon rank sum test (\*\*\*: p ≤ 0.001).

651

652

**Table 1.** Software tools for spatial analysis

| <b>Software</b>     | <b>Platform</b>                     | <b>Input</b>                                                        | <b>Output</b>                                                                                                                                      | <b>Reference</b> |
|---------------------|-------------------------------------|---------------------------------------------------------------------|----------------------------------------------------------------------------------------------------------------------------------------------------|------------------|
| <b>histoCAT</b>     | MATLAB, standalone program          | Imaging mass cytometry                                              | User-guided cell neighborhood for selected cells, enrichments/depletion of cell-cell interactions based on comparison to spatially randomized data | (50)             |
| <b>Pelkmans lab</b> | Module compatible with CellProfiler | Cell cultures                                                       | Local cell density, population size, cell islet edges                                                                                              | (34, 49, 51, 52) |
| <b>Cell-graph</b>   | Standalone tool                     | H&E stained tissue samples                                          | Multiple graph metrics, e.g. clustering coefficient, network diameter                                                                              | (15)             |
| <b>PySpacell</b>    | Python                              | Cell cultures                                                       | Statistical tests of magnitude and scale of spatial effects                                                                                        | (53)             |
| <b>SpatialDE</b>    | Python                              | Spatial transcriptomics datasets                                    | Statistical tests of genes with spatial variation, spatial gene-clustering                                                                         | (54)             |
| <b>trendsceek</b>   | R                                   | Spatial transcriptomics datasets                                    | Statistical tests of genes with spatial variation                                                                                                  | (55)             |
| <b>cytoMAP</b>      | MATLAB                              | Histo-cytometry data                                                | Multi-scale characterization of tissue structure                                                                                                   | (56)             |
| <b>MuSIC</b>        | Cytoscape                           | Immunofluorescence and affinity purification mass spectrometry data | Intracellular protein positions and distances                                                                                                      | (57)             |

653

654 **Table 2.** Software tools for calcium signal analysis.

| <b>Software</b>       | <b>Platform</b> | <b>Input</b> | <b>Output</b>                                                                                                | <b>Reference</b> |
|-----------------------|-----------------|--------------|--------------------------------------------------------------------------------------------------------------|------------------|
| <i>unnamed</i>        | MATLAB          | Images       | Segmentation, signal extraction, stimulus response analysis, assembly detection, network dynamics analysis   | (58)             |
| <b>CaImAn</b>         | Python          | Images       | Motion correction, source extraction, deconvolution, registration                                            | (59)             |
| <b>EZcalcium</b>      | MATLAB          | Images       | Motion correction, segmentation, signal extraction, deconvolution                                            | (60)             |
| <b>NA<sup>3</sup></b> | ImageJ, R       | Images       | Total activity value, variance area                                                                          | (61)             |
| <b>CAVE</b>           | MATLAB          | Images       | Motion correction, $\Delta F/F$ calculation, cell detection, calcium trace analysis                          | (62)             |
| <b>CaSiAn</b>         | Java            | Signal data  | Peak and nadir detection, interspike interval and average period regression, signal correlation              | (63)             |
| <b>SIMA</b>           | Python          | Images       | Motion correction, segmentation, signal extraction, ROI registration                                         | (64)             |
| <b>Suite2p</b>        | MATLAB, Python  | Images       | Image registration, ROI detection, cell determination, activity and neuropil extraction, spike deconvolution | (65)             |
| <b>CNMF-E</b>         | MATLAB          | Images       | Contour detection, signal extraction                                                                         | (66)             |
| <b>ABLE</b>           | MATLAB          | Images       | Contour detection, neuropil correction, signal extraction                                                    | (67)             |
| <b>SCALPEL</b>        | R               | Images       | Segmentation, signal extraction                                                                              | (68)             |
| <b>MIN1PIPE</b>       | MATLAB          | Images       | Motion correction, segmentation, signal extraction, deconvolution                                            | (69)             |
| <b>SamuROI</b>        | Python          | Images       | Image stabilization, event detection                                                                         | (70)             |

655

656 **Table 3.** Local neighborhood metrics calculated at the individual cell level

| <b>Graph Metrics</b>                  | <b>Symbol</b> | <b>Definition</b>                                                                      |
|---------------------------------------|---------------|----------------------------------------------------------------------------------------|
| <b>Degree</b>                         | $k$           | Number of neighbors one link away from cell of interest                                |
| <b>Average Neighbor Degree</b>        | $k_n$         | Average degree of all neighboring cells                                                |
| <b>Clustering Coefficient</b>         | $C$           | Number of edges in local neighborhood of a cell, divided by total possible connections |
| <b>Local Efficiency</b>               | $E_l$         | Average shortest path length in local neighborhood                                     |
| <b>Node Closeness Centrality</b>      | $c_n$         | Sum of reciprocal distances in number of links to all other nodes                      |
| <b>Node Betweenness Centrality</b>    | $w_n$         | Number of shortest paths that pass through a node                                      |
| <b>Shared Cell Border<sup>1</sup></b> | $S_b$         | Total number of pixels shared with neighbors                                           |

657

---

<sup>1</sup> Relevant only for type I graphs

658 **Table 4.** Global graph metrics and their normalization to account for network size.  $n$  = number of nodes,  $m$  = number of edges.

| Graph Metrics                                   | Symbol                 | Definition                                                                                                                                                  |
|-------------------------------------------------|------------------------|-------------------------------------------------------------------------------------------------------------------------------------------------------------|
| <b>Node Count</b>                               | $n$                    | Number of nodes                                                                                                                                             |
| <b>Edge Count</b>                               | $m$                    | Number of edges                                                                                                                                             |
| <b>Fraction Area Cells</b>                      | $A$                    | Fraction of total surface area in field of view covered by cells                                                                                            |
| <b>Average Degree</b>                           | $avgeK$                | Average number of connections for a node in the network                                                                                                     |
| <b>Variance in Degree</b>                       | $varK$                 | Variance of node degree sequence                                                                                                                            |
| <b>Network Heterogeneity</b>                    | NetworkHeterogeneity   | Standard deviation of node degree sequence divided by mean of degree sequence – reflects tendency of network to contain hub nodes                           |
| <b>Average Neighbor Degree</b>                  | $avgeNeighborK$        | Average degree of local neighborhood, averaged across all nodes                                                                                             |
| <b>Variance in Neighbor Degree</b>              | $varNeighborK$         | Variance of the average neighbor degree sequence                                                                                                            |
| <b>Network Efficiency</b>                       | $E$                    | The average reciprocal of shortest path length across all pairs of nodes, $E$                                                                               |
| <b>Average Clustering Coefficient</b>           | $C$                    | Fraction of total possible links among the neighbors of a node that are actually present, averaged across all nodes, $C$                                    |
| <b>Number of connected components</b>           | $nConnectedComponents$ | Number of disconnected sub-graphs in main graph                                                                                                             |
| <b>Average Size of Connected Components</b>     | $avgeComponentSize$    | Average number of nodes in each connected component                                                                                                         |
| <b>Variance in size of connected components</b> | $varComponentSize$     | Variance in component size sequence                                                                                                                         |
| <b>Network Diameter</b>                         | $networkDiameter$      | Longest shortest path length of network                                                                                                                     |
| <b>Isolated Node Count</b>                      | $nIsolatedNodes$       | Number of nodes with no neighbors                                                                                                                           |
| <b>Pair Node Count</b>                          | $nPairNodes$           | Number of independent pairs of nodes                                                                                                                        |
| <b>Triangular loop count</b>                    | $nLoops3$              | Number of loops of 3 nodes                                                                                                                                  |
| <b>4-star motif Count</b>                       | $nStar4$               | Number of star motifs with one hub and three spokes                                                                                                         |
| <b>5-star motif count</b>                       | $nStar5$               | Number of star motifs with one hub and four spokes                                                                                                          |
| <b>6-star motif count</b>                       | $nStar6$               | Number of star motifs with one hub and five spokes                                                                                                          |
| <b>Rich-Club Metric Average</b>                 | $avgeRichClubMetric$   | Measure of the tendency of nodes with high number of links to be well connected among each other (71); Computed for threshold degrees between 1 and $(n-1)$ |
| <b>Rich-Club Metric Variance</b>                | $varRiceClubMetric$    | Variance in rich-club metric for thresholds from 1 to $(n-1)$                                                                                               |
| <b>Assortativity</b>                            | Assortativity          | Pearson correlation coefficient of degrees between pairs of linked nodes(72).                                                                               |



## 660 References

- 661 1. Gonzalez-Porras M, Stojkova K, Vaicik MK, Pellowe A, Goddi A, Carmona A, et al.  
662 Integrins and extracellular matrix proteins module adipocyte thermogenic capacity. *Scientific*  
663 *Reports*. 2021;in press.
- 664 2. Mahadevan AS, Grandel NE, Robinson JT, Francis KR, Qutub AA. Living Neural  
665 Networks: Dynamic Network Analysis of Developing Neural Progenitor Cells. *bioRxiv*. 2021.
- 666 3. Meijering E, Carpenter AE, Peng H, Hamprecht FA, Olivo-Marín J-C. Imagining the future  
667 of bioimage analysis. *Nature Biotechnology*. 2016;34(12):1250-5.
- 668 4. Mund A, Coscia F, Hollandi R, Kovács F, Kriston A, Brunner A-D, et al. AI-driven Deep  
669 Visual Proteomics defines cell identity and heterogeneity. *bioRxiv*. 2021:2021.01.25.427969.
- 670 5. Bray M-A, Singh S, Han H, Davis CT, Borgeson B, Hartland C, et al. Cell Painting, a high-  
671 content image-based assay for morphological profiling using multiplexed fluorescent dyes. *Nature*  
672 *Protocols*. 2016;11(9):1757-74.
- 673 6. McQuin C, Goodman A, Chernyshev V, Kametsky L, Cimini A, Karhohs KW, et al.  
674 CellProfiler 3.0: Next-generation image processing for biology. *PLoS Biology*. 2018:1-17.
- 675 7. Kuthuru S, Szafran AT, Stossi F, Mancini MA, Rao A. Leveraging Image-Derived  
676 Phenotypic Measurements for Drug-Target Interaction Predictions. *Cancer Inform*.  
677 2019;18:1176935119856595.
- 678 8. Schürch CM, Bhate SS, Barlow GL, Phillips DJ, Noti L, Zlobec I, et al. Coordinated  
679 Cellular Neighborhoods Orchestrate Antitumoral Immunity at the Colorectal Cancer Invasive  
680 Front. *Cell*. 2020;182(5):1341-59.e19.
- 681 9. Vickovic S, Eraslan G, Salmén F, Klughammer J, Stenbeck L, Schapiro D, et al. High-  
682 definition spatial transcriptomics for in situ tissue profiling. *Nature Methods*. 2019;16(10):987-90.
- 683 10. Gut G, Herrmann MD, Pelkmans L. Multiplexed protein maps link subcellular organization  
684 to cellular states. *Science*. 2018;361(6401).
- 685 11. Eng CHL, Lawson M, Zhu Q, Dries R, Koulina N, Takei Y, et al. Transcriptome-scale  
686 super-resolved imaging in tissues by RNA seqFISH+. *Nature*. 2019;568(7751):235-9.
- 687 12. Thul PJ, Åkesson L, Wiking M, Mahdessian D, Geladaki A, Ait Blal H, et al. A subcellular  
688 map of the human proteome. *Science*. 2017;356(6340).
- 689 13. Bassett DS, Zurn P, Gold JI. On the nature and use of models in network neuroscience.  
690 *Nature Reviews Neuroscience*. 2018;19(9):566-78.
- 691 14. Bassett DS, Sporns O. Network neuroscience. *Nature Neuroscience*. 2017;20(3):353-64.
- 692 15. Yener B, Bülent. Cell-graphs. *Communications of the ACM*. 2016;60(1):74-84.
- 693 16. Qutub AA, Ryan DT, Long B, Zaunbrecher R, Hu CW, Slater JH, et al.,  
694 inventors Automated method for measuring, classifying, and matching the dynamics and  
695 information passing of single objects within one or more images 2013.
- 696 17. Rekhi R, Ryan DT, Zaunbrecher R, Hu CW, Qutub AA. Computational Cell Phenotyping  
697 in the Lab, Plant, and Clinic. In: Zhang G, editor. *Computational Bioengineering*: CRC Press;  
698 2015. p. 254-82.

- 699 18. Blankenship AG, Feller MB. Mechanisms underlying spontaneous patterned activity in  
700 developing neural circuits. *Nature reviews Neuroscience*. 2010;11(1):18-29.
- 701 19. Malmersjö S, Rebellato P, Smedler E, Planert H, Kanatani S, Liste I, et al. Neural  
702 progenitors organize in small-world networks to promote cell proliferation. *Proceedings of the*  
703 *National Academy of Sciences of the United States of America*. 2013;110:E1524-32.
- 704 20. Shimojo H, Ohtsuka T, Kageyama R. Oscillations in Notch Signaling Regulate  
705 Maintenance of Neural Progenitors. *Neuron*. 2008;58:52-64.
- 706 21. Otani T, Marchetto MC, Gage FH, Simons BD, Livesey FJ. 2D and 3D Stem Cell Models  
707 of Primate Cortical Development Identify Species-Specific Differences in Progenitor Behavior  
708 Contributing to Brain Size. *Cell Stem Cell*. 2016;18(4):467-80.
- 709 22. Li C, Xu D, Ye Q, Hong S, Jiang Y, Liu X, et al. Zika Virus Disrupts Neural Progenitor  
710 Development and Leads to Microcephaly in Mice. 2016.
- 711 23. Cai L, Hayes NL, Nowakowski RS. Synchrony of clonal cell proliferation and contiguity  
712 of clonally related cells: production of mosaicism in the ventricular zone of developing mouse  
713 neocortex. *The Journal of neuroscience : the official journal of the Society for Neuroscience*.  
714 1997;17(6):2088-100.
- 715 24. Reznikov K, van der Kooy D. Variability and partial synchrony of the cell cycle in the  
716 germinal zone of the early embryonic cerebral cortex. *The Journal of comparative neurology*.  
717 1995;360(3):536-54.
- 718 25. Sakaue-Sawano A, Kurokawa H, Morimura T, Hanyu A, Hama H, Osawa H, et al.  
719 Visualizing Spatiotemporal Dynamics of Multicellular Cell-Cycle Progression. *Cell*.  
720 2008;132(3):487-98.
- 721 26. Megat S, Ray PR, Tavares-Ferreira D, Moy JK, Sankaranarayanan I, Wangzhou A, et al.  
722 Differences between Dorsal Root and Trigeminal Ganglion Nociceptors in Mice Revealed by  
723 Translational Profiling. *J Neurosci*. 2019;39(35):6829-47.
- 724 27. Kim YS, Anderson M, Park K, Zheng Q, Agarwal A, Gong C, et al. Coupled Activation of  
725 Primary Sensory Neurons Contributes to Chronic Pain. *Neuron*. 2016;91(5):1085-96.
- 726 28. Kim YS, Chu Y, Han L, Li M, Li Z, LaVinka PC, et al. Central terminal sensitization of  
727 TRPV1 by descending serotonergic facilitation modulates chronic pain. *Neuron*. 2014;81(4):873-  
728 87.
- 729 29. López-Cancio E, Ricciardi AC, Sobrino T, Cortés J, de la Ossa NP, Millán M, et al.  
730 Reported Prestroke Physical Activity Is Associated with Vascular Endothelial Growth Factor  
731 Expression and Good Outcomes after Stroke. *Journal of Stroke and Cerebrovascular Diseases*.  
732 2017;26(2):425-30.
- 733 30. Wei ZZ, Zhang JY, Taylor TM, Gu X, Zhao Y, Wei L. Neuroprotective and regenerative  
734 roles of intranasal Wnt-3a Administration after focal ischemic stroke in mice. *Journal of Cerebral*  
735 *Blood Flow & Metabolism*. 2017:0271678X1770266-0271678X1770266.
- 736 31. Goodwin AM. In vitro assays of angiogenesis for assessment of angiogenic and anti-  
737 angiogenic agents. *Microvascular Research*. 2007;74(2):172-83.
- 738 32. Costa G, Harrington KI, Lovegrove HE, Page DJ, Chakravartula S, Bentley K, et al.  
739 Asymmetric division coordinates collective cell migration in angiogenesis. *Nature Cell Biology*.  
740 2016;18(12):1292-301.

- 741 33. Slater JH, Culver JC, Long BL, Hu CW, Hu J, Birk TF, et al. Recapitulation and  
742 Modulation of the Cellular Architecture of a User-Chosen Cell of Interest Using Cell-Derived,  
743 Biomimetic Patterning. *ACS Nano*. 2015;9(6):6128-38.
- 744 34. Snijder B, Sacher R, Ramo P, Damm E-M, Liberali P, Pelkmans L. Population context  
745 determines cell-to-cell variability in endocytosis and virus infection. *Nature*. 2009;461(7263):520-  
746 3.
- 747 35. Gut G, Tadmor MD, Pe'er D, Pelkmans L, Liberali P. Trajectories of cell-cycle progression  
748 from fixed cell populations. *Nature methods*. 2015;12(10):951-4.
- 749 36. Vaicik MK, Thyboll Kortessmaa J, Moverare-Skrtric S, Kortessmaa J, Soininen R, Bergstrom  
750 G, et al. Laminin alpha4 deficient mice exhibit decreased capacity for adipose tissue expansion  
751 and weight gain. *PLoS One*. 2014;9(10):e109854.
- 752 37. Vaicik MK, Blagajcevic A, Ye H, Morse MC, Yang F, Goddi A, et al. The Absence of  
753 Laminin  $\alpha 4$  in Male Mice Results in Enhanced Energy Expenditure and Increased Beige  
754 Subcutaneous Adipose Tissue. *Endocrinology*. 2018;159(1):356-67.
- 755 38. Vaicik MK, Morse M, Blagajcevic A, Rios J, Larson J, Yang F, et al. Hydrogel-Based  
756 Engineering of Beige Adipose Tissue. *J Mater Chem B*. 2015;3(40):7903-11.
- 757 39. Yang F, Cohen RN, Brey EM. Optimization of Co-Culture Conditions for a Human  
758 Vascularized Adipose Tissue Model. *Bioengineering (Basel)*. 2020;7(3).
- 759 40. Berg S, Kutra D, Kroeger T, Straehle CN, Kausler BX, Haubold C, et al. ilastik: interactive  
760 machine learning for (bio)image analysis. *Nature Methods*. 2019;16(12):1226-32.
- 761 41. Hollandi R, Szkalitsy A, Toth T, Tasnadi E, Molnar C, Mathe B, et al. nucleAIzer: A  
762 Parameter-free Deep Learning Framework for Nucleus Segmentation Using Image Style Transfer.  
763 *Cell Systems*. 2020;10(5):453-8.e6.
- 764 42. Moen E, Borba E, Miller G, Schwartz M, Bannon D, Koe N, et al. Accurate cell tracking  
765 and lineage construction in live-cell imaging experiments with deep learning. *bioRxiv*.  
766 2019:803205-.
- 767 43. Carpenter AE, Jones TR, Lamprecht MR, Clarke C, Kang IH, Friman O, et al. CellProfiler:  
768 image analysis software for identifying and quantifying cell phenotypes. *Genome Biology*.  
769 2006;7(10):R100-R.
- 770 44. Smedler E, Malmersjo S, Uhlen P. Network analysis of time-lapse microscopy recordings.  
771 *Front Neural Circuits*. 2014;8:111.
- 772 45. Bounova G, De Weck O. Overview of metrics and their correlation patterns for multiple-  
773 metric topology analysis on heterogeneous graph ensembles. *Physical Review E - Statistical,*  
774 *Nonlinear, and Soft Matter Physics*. 2012;85.
- 775 46. Lacoste A, Berenshteyn F, Brivanlou AH. An Efficient and Reversible Transposable  
776 System for Gene Delivery and Lineage-Specific Differentiation in Human Embryonic Stem Cells.  
777 *Cell Stem Cell*. 2009;5(3):332-42.
- 778 47. Ryan DT, Hu J, Long BL, Qutub AA. Predicting endothelial cell phenotypes in  
779 angiogenesis2013.
- 780 48. Hu CW, Li H, Qutub AA. Shrinkage Clustering: a fast and size-constrained clustering  
781 algorithm for biomedical applications. *BMC Bioinformatics*. 2018;19(1):19.

- 782 49. Snijder B, Sacher R, Rämö P, Liberali P, Mench K, Wolfrum N, et al. Single-cell analysis  
783 of population context advances RNAi screening at multiple levels. *Molecular Systems Biology*.  
784 2012;8.
- 785 50. Schapiro D, Jackson HW, Raghuraman S, Fischer JR, Zanutelli VRT, Schulz D, et al.  
786 histoCAT: analysis of cell phenotypes and interactions in multiplex image cytometry data. *Nature*  
787 *Methods*. 2017.
- 788 51. Popovic D, Koch B, Kueblbeck M, Ellenberg J, Pelkmans L. Multivariate Control of  
789 Transcript to Protein Variability in Single Mammalian Cells. *Cell Systems*. 2018;7(4):398-411.e6.
- 790 52. Irmisch A, Bonilla X, Chevrier S, Lehmann KV, Singer F, Toussaint NC, et al. The Tumor  
791 Profiler Study: integrated, multi-omic, functional tumor profiling for clinical decision support.  
792 *Cancer Cell*. 2021.
- 793 53. Rose F, Rappez L, Triana SH, Alexandrov T, Genovesio A. PySpacell: A Python Package  
794 for Spatial Analysis of Cell Images. *Cytometry Part A*. 2019.
- 795 54. Svensson V, Teichmann SA, Stegle O. SpatialDE: Identification of spatially variable  
796 genes. *Nature Methods*. 2018;15(5):343-6.
- 797 55. Edsgård D, Johnsson P, Sandberg R. Identification of spatial expression trends in single-  
798 cell gene expression data. *Nature Methods*. 2018;15(5):339-42.
- 799 56. Stoltzfus CR, Filipek J, Gern BH, Olin BE, Leal JM, Wu Y, et al. CytoMAP: A Spatial  
800 Analysis Toolbox Reveals Features of Myeloid Cell Organization in Lymphoid Tissues. *Cell*  
801 *Reports*. 2020;31(3).
- 802 57. Qin Y, Winsnes CF, Huttlin EL, Zheng F, Ouyang W, Park J, et al. Mapping cell structure  
803 across scales by fusing protein images and interactions. *bioRxiv*. 2020:2020.06.21.163709-  
804 2020.06.21.
- 805 58. Romano SA, Pérez-Schuster V, Jouary A, Boulanger-Weill J, Candeo A, Pietri T, et al. An  
806 integrated calcium imaging processing toolbox for the analysis of neuronal population dynamics.  
807 *PLOS Computational Biology*. 2017;13(6):e1005526-e.
- 808 59. Giovannucci A, Friedrich J, Gunn P, Kalfon J, Brown BL, Koay SA, et al. CaImAn an  
809 open source tool for scalable calcium imaging data analysis. *eLife*. 2019;8.
- 810 60. Cantu DA, Wang B, Gongwer MW, He CX, Goel A, Suresh A, et al. EZcalcium: Open  
811 Source Toolbox for Analysis of Calcium Imaging Data. *bioRxiv*. 2020:2020.01.02.893198-  
812 2020.01.02.
- 813 61. Prada J, Sasi M, Martin C, Jablonka S, Dandekar T, Blum R. An open source tool for  
814 automatic spatiotemporal assessment of calcium transients and local ‘signal-close-to-noise’  
815 activity in calcium imaging data. *PLOS Computational Biology*. 2018;14(3):e1006054-e.
- 816 62. Tegtmeier J, Brosch M, Janitzky K, Heinze H-J, Ohl FW, Lippert MT. CAVE: An Open-  
817 Source Tool for Combined Analysis of Head-Mounted Calcium Imaging and Behavior in  
818 MATLAB. *Frontiers in Neuroscience*. 2018;12:958-.
- 819 63. Moein M, Grzyb K, Gonçalves Martins T, Komoto S, Peri F, Crawford AD, et al. CaSiAn:  
820 a Calcium Signaling Analyzer tool. *Bioinformatics*. 2018;34(17):3052-4.
- 821 64. Kaifosh P, Zaremba JD, Danielson NB, Losonczy A. SIMA: Python software for analysis  
822 of dynamic fluorescence imaging data. *Frontiers in Neuroinformatics*. 2014;8.

- 823 65. Pachitariu M, Stringer C, Schröder S, Dipoppa M, Rossi LF, Carandini M, et al. Suite2p:  
824 beyond 10,000 neurons with standard two-photon microscopy. *bioRxiv*. 2016:061507-.
- 825 66. Zhou P, Resendez SL, Rodriguez-Romaguera J, Jimenez JC, Neufeld SQ, Giovannucci A,  
826 et al. Efficient and accurate extraction of in vivo calcium signals from microendoscopic video data.  
827 *eLife*. 2018;7.
- 828 67. Reynolds S, Abrahamsson T, Schuck R, Sjöström PJ, Schultz SR, Dragotti PL. ABLE: an  
829 Activity-Based Level Set Segmentation Algorithm for Two-Photon Calcium Imaging Data.  
830 *bioRxiv*. 2017:190348-.
- 831 68. Petersen A, Simon N, Witten D. Scalpel: Extracting neurons from calcium imaging data.  
832 *Annals of Applied Statistics*. 2018;12(4):2430-56.
- 833 69. Lu J, Li C, Singh-Alvarado J, Zhou ZC, Fröhlich F, Mooney R, et al. MIN1PIPE: A  
834 Miniscope 1-Photon-Based Calcium Imaging Signal Extraction Pipeline. *Cell Reports*.  
835 2018;23(12):3673-84.
- 836 70. Rueckl M, Lenzi SC, Moreno-Velasquez L, Parthier D, Schmitz D, Ruediger S, et al.  
837 SamuROI, a Python-Based Software Tool for Visualization and Analysis of Dynamic Time Series  
838 Imaging at Multiple Spatial Scales. *Frontiers in Neuroinformatics*. 2017;11.
- 839 71. Colizza V, Flammini A, Serrano MA, Vespignani A. Detecting rich-club ordering in  
840 complex networks. 2006;2(February):110-5.
- 841 72. Newman M. Assortative Mixing in Networks. *Physical Review Letters*.  
842 2002;89(20):208701-.
- 843
